# Supplementary material
Source: PubMed Central journal article supplement (PMC3656634)
Supplement: hdy20139x1.pdf [file hdy20139x1.pdf]

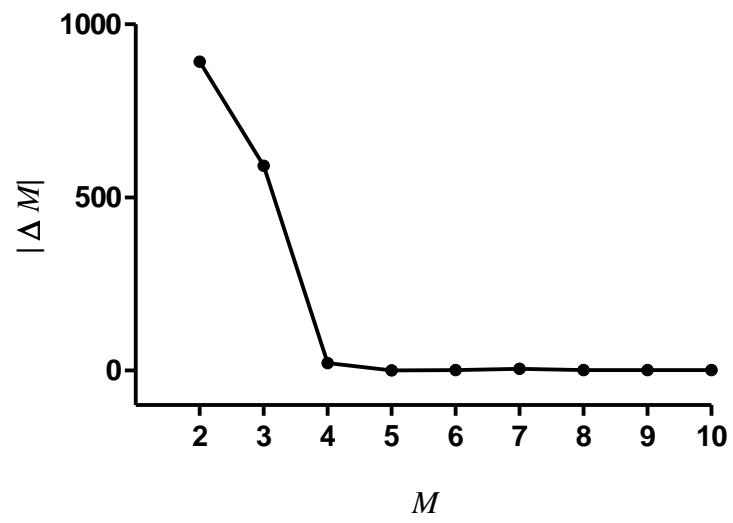

**Figure S1**  $\Delta K$ , calculated as the rate of change in log probability of data between each successive value of  $K$  2 to 10 (Evanno *et al.*, 2005).

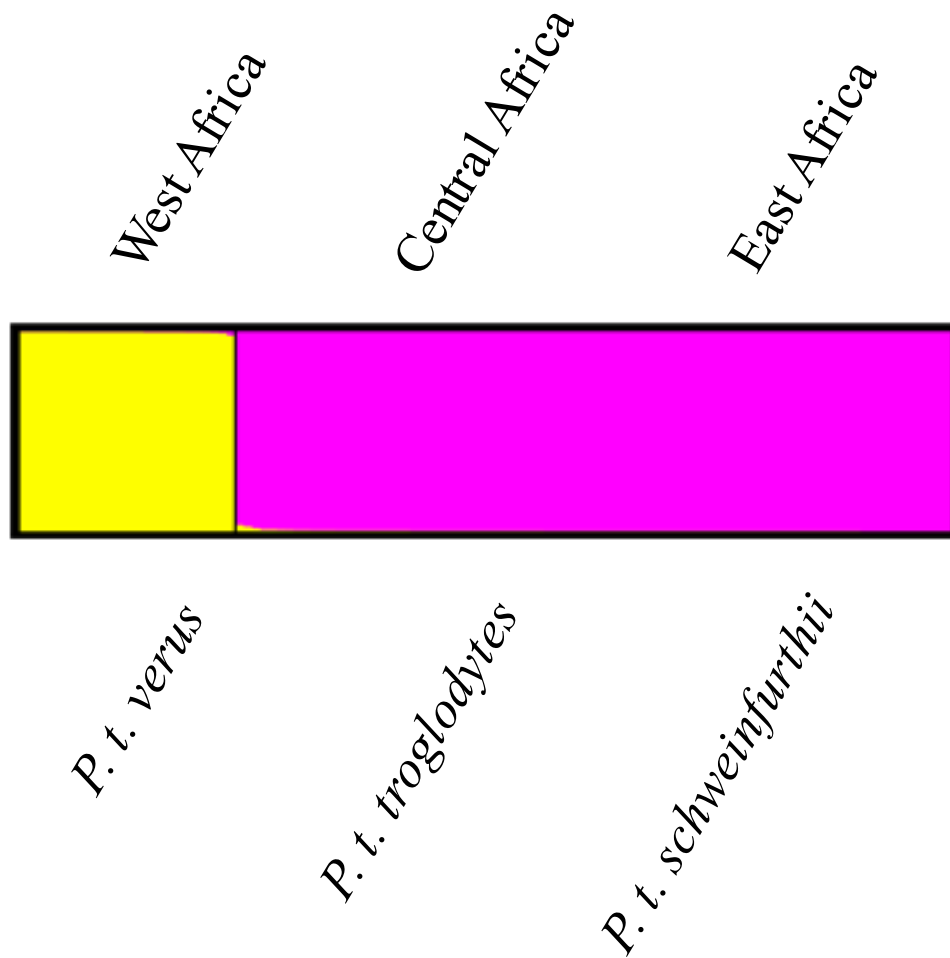

**Figure S2** Genetic clusters inferred from genotypic data of *Pan troglodytes* subspecies with known origin assuming  $K=2$ . Proportion of membership to each cluster for every sampled individual is indicated by colors in the vertical bars. The bar plots show the genetic structure among all subspecies when 2 clusters are assumed. Predefined subspecies origin is indicated below and geographical sampling location above.

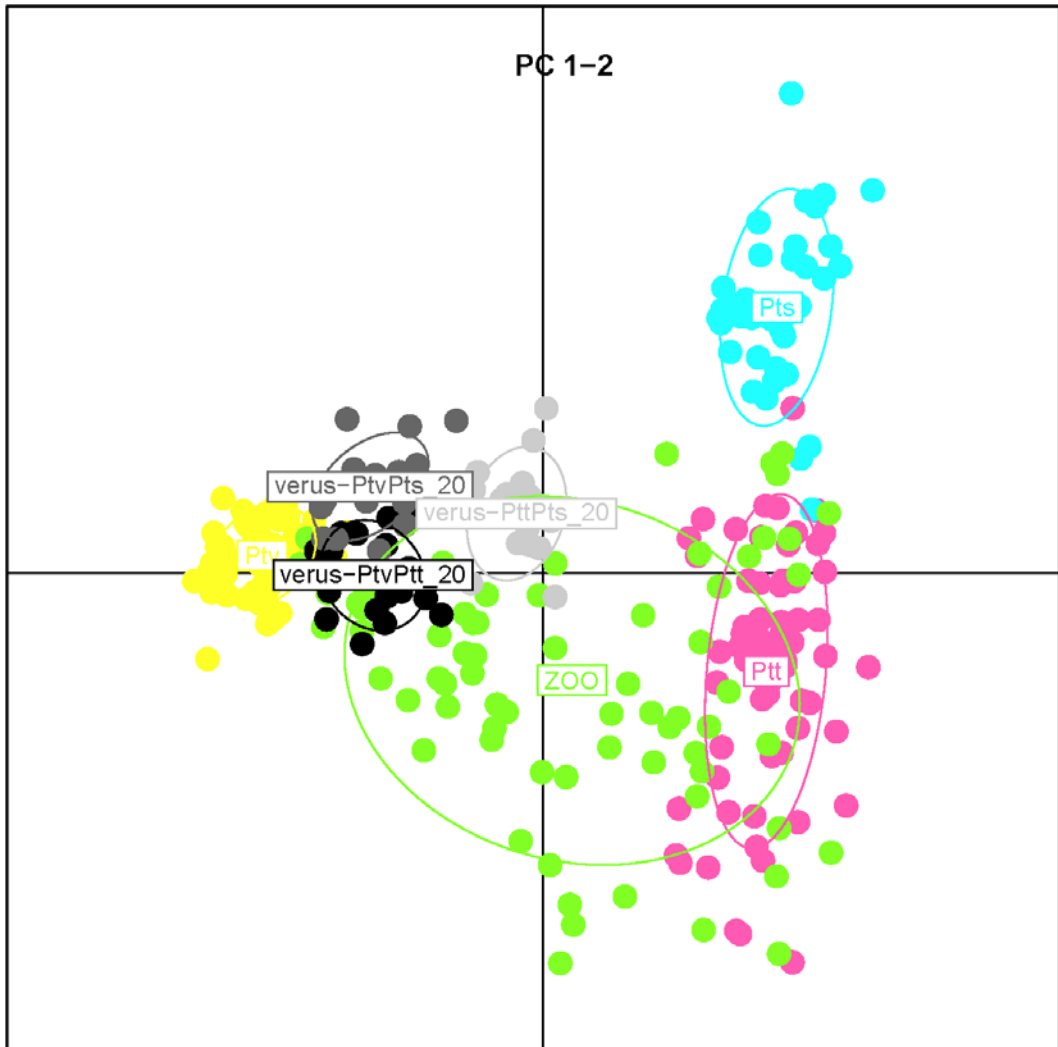

**Figure S5a** PCA with simulated first backcrossed populations. PCA of chimpanzee individuals from the species distribution range in Africa and zoo specimens of unknown origin. Colors: yellow, pink, turquoise and green for *P. t. verus*, *P. t. troglodytes*, *P. t. schweinfurthii* and zoo specimens, respectively. Simulated first backcrossed populations are color coded light grey, medium grey and dark grey for *P. t. verus* + F1 hybrid *P. t. troglodytes*/*P. t. schweinfurthii*, *P. t. verus* + F1 hybrid *P. t. schweinfurthii*/*P. t. verus* and *P. t. verus* + F1 hybrid *P. t. verus*, *P. t. troglodytes*, respectively. Each simulated population consists of 20 individuals. Principal components 1 and 2 are portrayed.

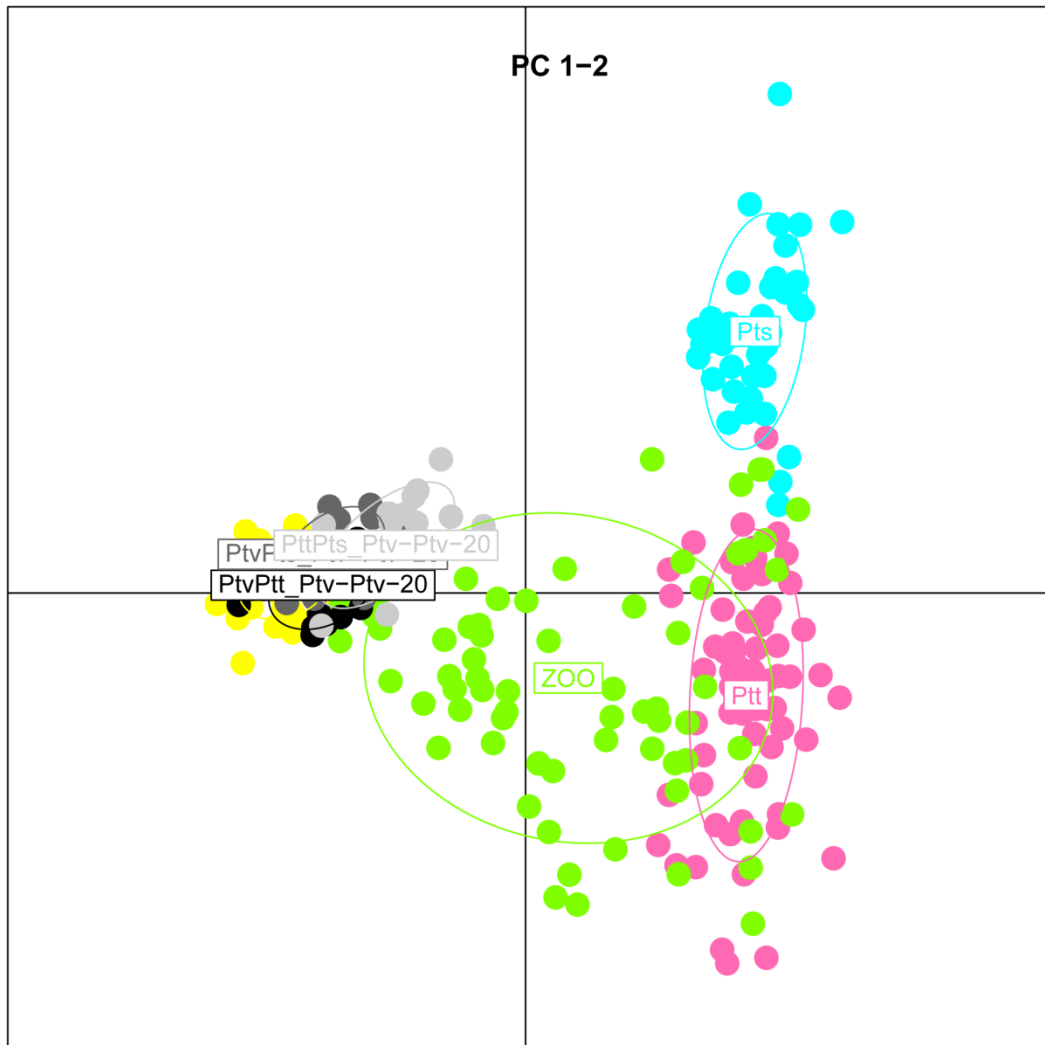

**Figure S5b** PCA with simulated second backcrossed populations. PCA of chimpanzee individuals from the species distribution range in Africa and zoo specimens of unknown origin. Colors: yellow, pink, turquoise and green for *P. t. verus*, *P. t. troglodytes*, *P. t. schweinfurthii* and zoo specimens, respectively. Simulated second backcrossed populations are color coded light grey, medium grey and dark grey for *P. t. verus* + *P. t. verus* + F1 hybrid *P. t. troglodytes*/*P. t. schweinfurthii*, *P. t. verus* + *P. t. verus* + F1 hybrid *P. t. schweinfurthii*/*P. t. verus* and *P. t. verus* + *P. t. verus* + F1 hybrid *P. t. verus*, *P. t. troglodytes*, respectively. Each simulated population consists of 20 individuals. Principal components 1 and 2 are portrayed.

**Table S1** Selected microsatellites included in the study

| Locus name               | Chromosome location | Chromosome arm | Locus or alias  | Repetition | Physical Map | Physical map chimpanzee | Chimpanzee chromosome size |
|--------------------------|---------------------|----------------|-----------------|------------|--------------|-------------------------|----------------------------|
| GATA104 <sup>2</sup>     | 7                   | q              |                 | 4          | 143115408    |                         | 16000000                   |
| GATA129H04 <sup>2</sup>  | 1                   | p              | D1S3721         | 4          | 41139784     | 41939550                | 23000000                   |
| GATA176C01 <sup>2</sup>  | 2A                  | q              | D2S2972         | 4          | 102193472    | 103014986               | 11400000                   |
| GATA71H05 <sup>2</sup>   | 16                  | p              | D16S769         | 4          | 26125312     | 26523220                | 9100000                    |
| ATA27A06P <sup>2</sup>   | 12                  | p              | D12S1042        | 3          | 28000000     | 61484711                | 13500000                   |
| GATA43A04 <sup>2</sup>   | 1                   | q              | D1S1653         | 4          | 155149568    | 137209946               | 23000000                   |
| GATA14E09 <sup>2</sup>   | 8                   | q              | D8S2324         | 4          | 74304288     | 71774890                | 14500000                   |
| GATA116B01N <sup>2</sup> | 2A                  | p              | D2S2952         | 4          | 8099777      | 8109207                 | 11400000                   |
| GATA50G06 <sup>2</sup>   | 15                  | q              | D15S643         | 4          | 57429880     | 56904861                | 10000000                   |
| UT7544 <sup>2</sup>      | 19                  | q              | D19S559         | 4          | 50022064     | 50420864                | 6400000                    |
| GGAA21G11L <sup>2</sup>  | 14                  | q              | D14S617         | 4          | 90192832     | 91907364                | 10700000                   |
| GATA28F03 <sup>2</sup>   | 4                   | p              | D4S3248         | 4          | 60024876     | 71354945                | 19500000                   |
| TCTA017M <sup>2</sup>    | 9                   | q              |                 | 4          | 116500000    |                         | 13900000                   |
| AGAT120 <sup>2</sup>     | 22                  | q              | SNP343411       | 4          | 19665174     |                         | 5000000                    |
| GATA25A04 <sup>2</sup>   | 17                  | p              | D17S1299        | 4          | 39367576     | 16675989                | 8300000                    |
| GATA129D11N <sup>2</sup> | 21                  | q              | D21S2052        | 4          | 27740436     | 27266723                | 4600000                    |
| GATA8C04 <sup>2</sup>    | 17                  | q              | D17S974         | 4          | 10719277     | 45820261                | 8300000                    |
| ATA11D10M                | 6                   | q              | D6S1021         | 3          | 104719488    | 105962294               | 17400000                   |
| GATA68A03                | 5                   | q              | D5S2501         | 4          | 110112528    | 111932946               | 18400000                   |
| GATA24F03                | 7                   | p              | D7S1819-D7S3056 | 4          | 4237377      | 4433628                 | 16000000                   |
| GATA29F06z               | 20                  | p              | D20S477         | 4          | 22407060     | 22715352                | 6200000                    |
| GATA4D07                 | 2B                  | q              | D2S1334         | 4          | 136667216    | 139869314               | 25000000                   |
| GATA63D12P               | 12                  | q              | D12S1064        | 4          | 89325736     | 91303898                | 13500000                   |
| GATA88F09                | 10                  | p              | D10S1435        | 4          | 2197272      | 2312409                 | 13500000                   |
| GATA63F09                | 11                  | p              | D11S2365        | 4          | 55981152     | 2402952                 | 13400000                   |
| ATA25F04                 | Y                   | q              | DYS392          | 3          | 21478942     |                         | 2400000                    |

<sup>1</sup> Values from the study by Becquet *et al.* (2007). Informativeness is defined in Rosenberg *et al.* (2003)

<sup>2</sup> Microsatellites analysed in the subspecies dataset ( $n=157$ )

| <b>Informativeness<sup>1</sup></b> | <b>Number of alleles</b> | <b>Allele size Range</b> | <b>Forward primer</b>     | <b>Reverse primer</b>           |
|------------------------------------|--------------------------|--------------------------|---------------------------|---------------------------------|
| 0.997608                           | 28                       | 167 224                  | CCTCCATAATTGTGTGAGCC      | TGCATAAGTGAAACTTTATGCC          |
| 0.965041                           | 23                       | 146 255                  | AGAGAACGGAACCAACAGAA      | GGTCTCTTACCTGGCAGACA            |
| 0.864309                           | 24                       | 196 263                  | TCTCACTACACCACCTGGGT      | CTCTATCTCTATCTCTGTCTCTGCC       |
| 0.863574                           | 24                       | 238 294                  | GAGCCTGAGCAGTAGTCAGC      | GACATTGTCAGTGTGAGCCA            |
| 0.862575                           | 11                       | 111 142                  | TATGACGGTGCACCACATAC      | GTTTCTTAACCTGCATGTTCTGCATAT     |
| 0.856855                           | 28                       | 113 186                  | GGAAAGCCTGTAGGAAGAGG      | CCTGGATGACAGAGTGCTCT            |
| 0.854694                           | 9                        | 181 211                  | TGAAAACATAGTACAATGAACATCC | GTCATAATATCTGCCAATGATTG         |
| 0.852129                           | 20                       | 140 203                  | ATGGCCTATTGTGGGATCTT      | AATCAGCATGCCCACTGTAT            |
| 0.842507                           | 16                       | 187 266                  | ATACCTGGAGTCCTTGGTCC      | AACAGCTTTAAAACCTCAATGC          |
| 0.839055                           | 18                       | 144 180                  | ACTCCAGTCTGTGTGACAG       | CATAATAGGTTTGAGGTATCT           |
| 0.835032                           | 14                       | 137 190                  | TTTTAGGTGGCCACCATCTA      | ATCCAGTTTAGGCAACAGAACA          |
| 0.795523                           | 15                       | 227 271                  | TTCAGGAGTTTAGCTTTCTATGC   | CTACACCATCAGTACTCACTAGGC        |
| 0.795131                           | 15                       | 162 200                  | CAGCATGAGAGTGGTTGAGG      | TGGTGTCAAACATGAATTAGGC          |
| 0.791061                           | 13                       | 249 289                  | CTGGGCAACAAAGTGAGACC      | TTGTCTGTCTATCTATCTACCCATC       |
| 0.790268                           | 21                       | 166 239                  | TAGCACTTGAGCACACATGG      | GTGCATTATGGGGACCATTA            |
| 0.759255                           | 6                        | 101 129                  | GCACCCCTTTATACTTGGGTG     | TAGTACTCTACCATCCATCTATCCC       |
| 0.756707                           | 14                       | 188 215                  | AGACCCTGTCTCAGATAGATGG    | TAAAATAGAAAGTGCCCTCC            |
| 0.744306                           | 16                       | 120 150                  | TTGGAAGACATTTGCAGTCA      | TGTCCAGGAATATCACCACA            |
| 0.74394                            | 43                       | 263 363                  | TGATTACTCTGAGGAAGAAGGC    | TTGAAATGGGCACAGAAATT            |
| 0.731333                           | 27                       | 144 186                  | CAATAGCCCTGACCTTATGC      | TACCTACCTACCTACCTCTATGGC        |
| 0.718056                           | 14                       | 228 262                  | TCTCTGCCATTCTGAACTTT      | ACACCTGCCTTTCTTTCTG             |
| 0.676265                           | 12                       | 211 255                  | AGGCCTCTCTTCGAATGATT      | CTCCATGATCCAGTCACCTC            |
| 0.65937                            | 19                       | 145 203                  | ACTACTCCAAGGTTCCAGCC      | GTTTCTTAATATTGACTTTCTCTTGCTACCC |
| 0.646532                           | 19                       | 262 318                  | TACTTGGGATGCTAAGGTGG      | TTGGGTTTCCTGACTTGTGT            |
| 0.625502                           | 15                       | 223 263                  | TTCACATGCATATGTCTTTATGG   | CTGTCTAGTGTCTGAGCTGC            |
| 0.840013                           | 8                        | 228 261                  | TCATTAATCTAGCTTTTAAAAACAA | AGACCCAGTTGATGCAATGT            |

**Table S2** Chimpanzee samples of known origin included in the study.

| <b>ID</b> | <b>Subspecies<sup>1</sup></b> | <b>Sex</b> | <b>Origin</b> | <b>EAZA<sup>2</sup> #</b> | <b>Other</b>   |
|-----------|-------------------------------|------------|---------------|---------------------------|----------------|
| Marco     | <i>P. t. verus</i>            | M          | Sierra Leone  | 10794                     | mtDNA verified |
| Liesbeth  | <i>P. t. verus</i>            | F          | Sierra Leone  | 10795                     | mtDNA verified |
| Debbie    | <i>P. t. verus</i>            | F          | Sierra Leone  | 10886                     | mtDNA verified |
| Yvonne    | <i>P. t. verus</i>            | F          | Sierra Leone  | 10888                     | mtDNA verified |
| Totie     | <i>P. t. verus</i>            | F          | Sierra Leone  | 10986                     | mtDNA verified |
| Carolina  | <i>P. t. verus</i>            | F          | Sierra Leone  | 11051                     | mtDNA verified |
| Frits     | <i>P. t. verus</i>            | M          | Sierra Leone  | 11052                     |                |
| Gina      | <i>P. t. verus</i>            | F          | Sierra Leone  | 11053                     | mtDNA verified |
| Renee     | <i>P. t. verus</i>            | F          | Sierra Leone  | 11057                     | mtDNA verified |
| Jolanda   | <i>P. t. verus</i>            | F          | Sierra Leone  | 11081                     | mtDNA verified |
| Diana     | <i>P. t. verus</i>            | F          | Sierra Leone  | 11110                     | mtDNA verified |
| Louise    | <i>P. t. verus</i>            | F          | Sierra Leone  | 11111                     | mtDNA verified |
| Regina    | <i>P. t. verus</i>            | F          | Sierra Leone  | 11112                     | mtDNA verified |

|          |                          |   |                                                 |       |                |
|----------|--------------------------|---|-------------------------------------------------|-------|----------------|
| Susie    | <i>P. t. verus</i>       | F | Sierra Leone                                    | 11115 | mtDNA verified |
| Sonja    | <i>P. t. verus</i>       | F | Sierra Leone                                    | 11160 | mtDNA verified |
| Lady     | <i>P. t. verus</i>       | F | Sierra Leone                                    | 11205 | mtDNA verified |
| Yoko     | <i>P. t. verus</i>       | F | Sierra Leone                                    | 11207 | mtDNA verified |
| Wodka    | <i>P. t. verus</i>       | F | Sierra Leone                                    | 11209 | mtDNA verified |
| Pearl    | <i>P. t. verus</i>       | F | Sierra Leone                                    | 11210 | mtDNA verified |
| Sherry   | <i>P. t. verus</i>       | F | Sierra Leone                                    | 11251 | mtDNA verified |
| Olga     | <i>P. t. verus</i>       | F | 1. gen of wild caught parents from Sierra Leone | 12113 | mtDNA verified |
| Sita     | <i>P. t. verus</i>       | F | 1. gen of wild caught parents from Liberia      | 11262 |                |
| Ricky    | <i>P. t. verus</i>       | M | Liberia                                         | 10811 | mtDNA verified |
| SeppToni | <i>P. t. verus</i>       | M | Liberia                                         | 11300 |                |
| Linda    | <i>P. t. verus</i>       |   | Liberia                                         | 12122 | mtDNA verified |
| Susie A  | <i>P. t. verus</i>       | F | West Africa                                     | 11363 | mtDNA verified |
| Cabinda  | <i>P. t. troglodytes</i> |   | Cabinda, Angola                                 |       |                |
| Caline   | <i>P. t. troglodytes</i> |   | Cabinda, Angola                                 |       |                |



|          |                          |   |                        |
|----------|--------------------------|---|------------------------|
| Massabi  | <i>P. t. troglodytes</i> |   | Cabinda, Angola        |
| Noemie   | <i>P. t. troglodytes</i> | F | Equatorial Guinea      |
| Lalala   | <i>P. t. troglodytes</i> | F | Libreville, Gabon      |
| Makokou  | <i>P. t. troglodytes</i> | F | Ogooué Ivindo, Gabon   |
| Judy     | <i>P. t. troglodytes</i> | F | Ogooué Maritime, Gabon |
| Doris    | <i>P. t. troglodytes</i> | F | Ogooué Maritime, Gabon |
| Fifi     | <i>P. t. troglodytes</i> | F | Port-Gentil, Gabon     |
| Aboume   | <i>P. t. troglodytes</i> | M | Gabon                  |
| Bakoumba | <i>P. t. troglodytes</i> | M | Gabon                  |
| Chiquita | <i>P. t. troglodytes</i> | F | Gabon                  |
| Clara    | <i>P. t. troglodytes</i> | F | Gabon                  |
| Ayrton   | <i>P. t. troglodytes</i> | M | Moanda, Gabon          |
| Brigitte | <i>P. t. troglodytes</i> | F | Moanda, Gabon          |
| Morphee  | <i>P. t. troglodytes</i> | F | Makokou, Gabon         |
| Mpassa   | <i>P. t. troglodytes</i> | M | Makokou, Gabon         |

|            |                          |   |                                    |
|------------|--------------------------|---|------------------------------------|
| Mvadi      | <i>P. t. troglodytes</i> | M | Makokou, Gabon                     |
| Benefice   | <i>P. t. troglodytes</i> | F | Makokou, Gabon                     |
| Julie      | <i>P. t. troglodytes</i> | F | Haut Ogooué, Gabon                 |
| Masuku     | <i>P. t. troglodytes</i> | F | Haut Ogooué, Gabon                 |
| Moanda     | <i>P. t. troglodytes</i> | M | Haut Ogooué, Gabon                 |
| Amelie     | <i>P. t. troglodytes</i> | F | Haut Ogooué, Gabon                 |
| Vaillant   | <i>P. t. troglodytes</i> | M | Haut Ogooué, Gabon                 |
| Makata     | <i>P. t. troglodytes</i> | M | Haut Ogooué, Gabon                 |
| Agathe     | <i>P. t. troglodytes</i> |   | Kouilou, Peoples Republic of Congo |
| Charlotte  | <i>P. t. troglodytes</i> |   | Kouilou, Peoples Republic of Congo |
| Choupette  | <i>P. t. troglodytes</i> |   | Confiscated in Brazzaville         |
| Emilie     | <i>P. t. troglodytes</i> |   | Kouilou, Peoples Republic of Congo |
| Emmanuelle | <i>P. t. troglodytes</i> |   | Kouilou, Peoples Republic of Congo |
| Fanny      | <i>P. t. troglodytes</i> |   | Kouilou, Peoples Republic of Congo |
| Gina       | <i>P. t. troglodytes</i> |   | Kouilou, Peoples Republic of Congo |

|           |                          |                                     |
|-----------|--------------------------|-------------------------------------|
| Hinda     | <i>P. t. troglodytes</i> | Kouilou, Peoples Republic of Congo  |
| Jeanette  | <i>P. t. troglodytes</i> | Kouilou, Peoples Republic of Congo  |
| Pepere    | <i>P. t. troglodytes</i> | Kouilou, Peoples Republic of Congo  |
| Sophie    | <i>P. t. troglodytes</i> | Kouilou, Peoples Republic of Congo  |
| Stephanie | <i>P. t. troglodytes</i> | Kouilou, Peoples Republic of Congo  |
| Yvette    | <i>P. t. troglodytes</i> | Kouilou, Peoples Republic of Congo  |
| Dimonika  | <i>P. t. troglodytes</i> | Kouilou, Peoples Republic of Congo  |
| Bougnoule | <i>P. t. troglodytes</i> | Niari, Peoples Republic of Congo    |
| Loubomo   | <i>P. t. troglodytes</i> | Niari, Peoples Republic of Congo    |
| Makabana  | <i>P. t. troglodytes</i> | Niari, Peoples Republic of Congo    |
| Matalila  | <i>P. t. troglodytes</i> | Niari, Peoples Republic of Congo    |
| Mossenjo  | <i>P. t. troglodytes</i> | Niari, Peoples Republic of Congo    |
| Rosette   | <i>P. t. troglodytes</i> | Lekoumou, Peoples Republic of Congo |
| Sibiti    | <i>P. t. troglodytes</i> | Lekoumou, Peoples Republic of Congo |
| Teo       | <i>P. t. troglodytes</i> | Niari, Peoples Republic of Congo    |

|          |                             |   |                           |       |                                                   |
|----------|-----------------------------|---|---------------------------|-------|---------------------------------------------------|
| Victoria | <i>P. t. troglodytes</i>    | F | Unknown                   | 10892 | mtDNA verified                                    |
| Susi     | <i>P. t. troglodytes</i>    | F | Wild caught               | 11043 | mtDNA verified                                    |
| Brigitte | <i>P. t. troglodytes</i>    | F | Wild caught               | 10887 | mtDNA verified                                    |
| Cindy    | <i>P. t. troglodytes</i>    | F | Wild caught               | 11525 | mtDNA verified                                    |
| Moritz   | <i>P. t. troglodytes</i>    | M | Wild caught               | 10920 | Microsatellite verified<br>before included in the |
| Asega    | <i>P. t. schweinfurthii</i> | M | Democratic Republic Congo |       |                                                   |
| Baluku   | <i>P. t. schweinfurthii</i> | M | Democratic Republic Congo |       |                                                   |
| Billi    | <i>P. t. schweinfurthii</i> | F | Democratic Republic Congo |       |                                                   |
| Ikuru    | <i>P. t. schweinfurthii</i> | F | Democratic Republic Congo |       |                                                   |
| Indi     | <i>P. t. schweinfurthii</i> | M | Democratic Republic Congo |       |                                                   |
| Kalema   | <i>P. t. schweinfurthii</i> | M | Democratic Republic Congo |       |                                                   |
| Kidongo  | <i>P. t. schweinfurthii</i> | F | Democratic Republic Congo |       |                                                   |
| Kisembo  | <i>P. t. schweinfurthii</i> | M | Democratic Republic Congo |       |                                                   |
| Maisko   | <i>P. t. schweinfurthii</i> | M | Democratic Republic Congo |       |                                                   |
| Mawa     | <i>P. t. schweinfurthii</i> | M | Democratic Republic Congo |       |                                                   |

|          |                             |   |                           |       |                                                |
|----------|-----------------------------|---|---------------------------|-------|------------------------------------------------|
| Nakuu    | <i>P. t. schweinfurthii</i> | F | Democratic Republic Congo |       |                                                |
| Okech    | <i>P. t. schweinfurthii</i> | M | Democratic Republic Congo |       |                                                |
| Pasa     | <i>P. t. schweinfurthii</i> | F | Democratic Republic Congo |       |                                                |
| Robbie   | <i>P. t. schweinfurthii</i> | M | Democratic Republic Congo |       |                                                |
| Sophie   | <i>P. t. schweinfurthii</i> | F | Democratic Republic Congo |       |                                                |
| Sunday   | <i>P. t. schweinfurthii</i> | M | Democratic Republic Congo |       |                                                |
| Umugenzi | <i>P. t. schweinfurthii</i> | M | Democratic Republic Congo |       |                                                |
| Umutama  | <i>P. t. schweinfurthii</i> | M | Democratic Republic Congo |       |                                                |
| Yoyo     | <i>P. t. schweinfurthii</i> | F | Democratic Republic Congo |       |                                                |
| Nani     | <i>P. t. schweinfurthii</i> | F | Unknown                   |       | Microsatellite verified before included in the |
| Paula    | <i>P. t. schweinfurthii</i> | F | Wild Caught               | 11784 | mtDNA verified                                 |
| Exota    | <i>P. t. schweinfurthii</i> | F | Wild Caught               | 11785 | mtDNA verified                                 |
| Niko     | <i>P. t. schweinfurthii</i> | M | Govt. Belgium             | 12232 | mtDNA verified                                 |
| Noach    | <i>P. t. schweinfurthii</i> | M | Govt. Belgium             | 12231 | mtDNA verified                                 |
| Cindy    | <i>P. t. schweinfurthii</i> | F | Budongo, Uganda           |       |                                                |

|            |                             |   |                                                 |
|------------|-----------------------------|---|-------------------------------------------------|
| Eddy       | <i>P. t. schweinfurthii</i> | M | Kibale, Uganda                                  |
| Natasha    | <i>P. t. schweinfurthii</i> | F | Kibale, Uganda                                  |
| Tumbo      | <i>P. t. schweinfurthii</i> | M | Kibale, Uganda                                  |
| Megan      | <i>P. t. schweinfurthii</i> | F | Rwanda                                          |
| Becky      | <i>P. t. schweinfurthii</i> | F | Uganda                                          |
| Bwambale   | <i>P. t. schweinfurthii</i> | M | Uganda                                          |
| Connie     | <i>P. t. schweinfurthii</i> | F | Uganda                                          |
| Nkumwa     | <i>P. t. schweinfurthii</i> | F | Uganda                                          |
| Mgbadolite | <i>P. t. schweinfurthii</i> | M | Village de Gbadolite, Democratic Republic Congo |

---

<sup>1</sup> Subspecies assumed according to geographical origin information

<sup>2</sup> European Association of Zoos and Aquaria studbook number

**Table S3** Chimpanzee samples of unknown origin included in the study.

| <b>ID</b> | <b>EAZA<sup>1</sup> #</b> | <b>Sex</b> |
|-----------|---------------------------|------------|
| Blacky    | 10667                     | F          |
| Marina    | 10742                     | F          |
| Jimmi     | 10784                     | F          |
| Cindy     | 10964                     | F          |
| Og        | 10975                     | M          |
| Fips      | 11046                     | F          |
| Joey      | 11134                     | M          |
| Pippi     | 11193                     | F          |
| Lady      | 11205                     | F          |
| Choppers  | 11284                     | F          |
| Kate      | 11309                     | F          |
| Mirin     | 11352                     | F          |
| Judy      | 11371                     | F          |
| Noddy     | 11376                     | F          |
| Sam       | 11378                     | M          |
| Heidi     | 11387                     | F          |
| Luisa     | 11421                     | F          |
| Malin     | 11431                     | F          |
| Max       | 11492                     | M          |
| David     | 11539                     | M          |
| Nicky     | 11594                     | F          |
| Kip       | 11614                     | M          |
| Tojo      | 11639                     | F          |
| Lucy      | 11650                     | F          |
| Judy      | 11664                     | F          |
| Putzi     | 11669                     | F          |
| Moniek    | 11688                     | F          |
| Toto I    | 11696                     | M          |
| Shirley   | 11724                     | F          |
| Santino   | 11749                     | M          |
| Roosje    | 11799                     | F          |
| Andy      | 11802                     | M          |
| Emma      | 11932                     | F          |
| Brigitte  | 11939                     | F          |
| Bini      | 11949                     | F          |
| Kiki      | 11969                     | F          |
| Fali      | 12044                     | F          |
| Nilla     | 12052                     | F          |
| Lyndsey   | 12060                     | F          |
| Arnold    | 12063                     | M          |
| Gaby      | 12080                     | F          |
| Chiquita  | 12089                     | F          |

|           |       |   |
|-----------|-------|---|
| Menolly   | 12130 | F |
| Uska      | 12168 | F |
| Maaike    | 12170 | F |
| Utomde    | 12194 | M |
| Pippin    | 12209 | M |
| Linda     | 12256 | F |
| Chispi    | 12271 | F |
| Maria     | 12283 | F |
| Miff      | 12299 | F |
| Ula       | 12311 | F |
| Cindy     | 12314 | F |
| Lara      | 12320 | F |
| Lily      | 12323 | F |
| Chita     | 12328 | M |
| Moren     | 12341 | M |
| Luky      | 12348 | M |
| Sally     | 12361 | F |
| Copper    | 12388 | F |
| Tatu      | 12396 | M |
| Shirly    | 12419 | F |
| Jonathan  | 12454 | M |
| Jamie     | 12455 | M |
| Malin     | 12472 | F |
| Siri      | 12559 | F |
| Qafzeh    | 12600 | M |
| Quatro    | 12609 | M |
| Tzipi     | 12632 | F |
| Tambuzi   | 12647 | M |
| Negrita   | 12655 | F |
| Obe       | 12660 | M |
| Tupelo    | 12665 | F |
| Limbo     | 12667 | M |
| Kilimi    | 12678 | F |
| Geisha    | 12725 | F |
| Tsavo     | 12730 | M |
| Christmas | 12737 | F |
| Gost      | 12773 | M |
| Isabelle  | 12775 | F |
| Benji     | 12776 | M |
| Vakanga   | 12802 | F |
| Lizzy     | 12809 | F |
| Chrissie  | 12870 | F |
| Balima    | 12897 | F |
| Napoleon  | 12917 | M |
| Marios    | 12920 | M |
| Kindi     | 12922 | M |
| Melie     | 12931 | F |



|                 |                 |   |
|-----------------|-----------------|---|
| Patti           | 12946           | F |
| Gudu            | 12949           | M |
| Zarno           | 12976           | M |
| Liberius        | 13016           | M |
| Elisha          | 13025           | F |
| Knerten         | 13090           | M |
| Fanny           | 13098           | F |
| Guis            | 13100           | M |
| Cesare          | 13119           | M |
| Giorgia         | 13163           | F |
| Tisa            | 13173           | F |
| Simliki         | 13185           | F |
| NA <sup>2</sup> | 13205           | M |
| Tjobbe          | 13214           | M |
| Kume            | 13217           | M |
| Kisha           | 13231           | F |
| Nera            | 13270           | F |
| Daza            | 13640           | M |
| Jeudi           | 13649           | F |
| Antoine         | 13654           | M |
| Brigitta        | 13656           | F |
| Guidage         | 13658           | F |
| Toto            | 13692           | M |
| Maggy           | 13693           | F |
| Sony            | 13694           | M |
| Kymbo           | 13701           | M |
| Oseye           | 13724           | F |
| Pili            | 13725           | M |
| Petir           | 13726           | M |
| Frederike       | 13736           | F |
| Pembe           | 13753           | M |
| Adam            | 11727           | M |
| Bimbo           | NA <sup>2</sup> | M |
| Boby            | 13781           | M |
| Fritz           | 13793           | M |
| Max(1)          | 13813           | M |
| Max(2)          | 12914           | M |
| Susi            | 13819           | F |
| Tommy           | 13783           | M |

---

<sup>1</sup> European Association of Zoos and Aquaria studbook number

<sup>2</sup> Not available

**Table S4** Microsatellite genotypes of 112 chimpanzees sampled from the distribution range in Africa.

| <b>Sample ID</b>   | <b>GATA104</b> | <b>GATA129H04</b> | <b>GATA176C01</b> | <b>GATA71H05</b> | <b>ATA27A06P</b> | <b>GATA43A04</b> |
|--------------------|----------------|-------------------|-------------------|------------------|------------------|------------------|
| 10794_Marco_Ptv    | 182            | 205               | 215               | 261              | 120              | 132              |
|                    | 186            | 231               | 219               | 261              | 120              | 132              |
| 10795_Liesbeth_Ptv | 182            | 212               | 215               | 261              | 120              | 132              |
|                    | 182            | 231               | 215               | 261              | 136              | 136              |
| 10811_Ricky_Ptv    | 182            | 220               | 199               | 261              | 120              | 128              |
|                    | 194            | 227               | 215               | 261              | 120              | 136              |
| 10886_Debbie_Ptv   | 182            | 220               | 215               | 269              | 120              | 124              |
|                    | 186            | 223               | 263               | 269              | 120              | 132              |
| 10888_Yvonne_Ptv   | 186            | 220               | 211               | 261              | 120              | 136              |
|                    | 194            | 223               | 219               | 269              | 120              | 140              |
| 10986_Totie_Ptv    | 182            | 220               | 215               | 265              | 120              | 128              |
|                    | 182            | 223               | 219               | 265              | 120              | 136              |
| 11051_Carolina_Ptv | 200            | 201               | 219               | 261              | 120              | 128              |
|                    | 200            | 231               | 223               | 261              | 120              | 132              |
| 11052_Frits_Ptv    | 182            | 216               | 215               | 261              | 120              | 136              |
|                    | 197            | 220               | 222               | 261              | 142              | 140              |
| 11053_Gina_Ptv     | 181            | 216               | 215               | 261              | 120              | 132              |
|                    | 189            | 231               | 230               | 261              | 139              | 136              |
| 11057_Renee_Ptv    | 182            | 201               | 219               | 261              | 120              | 128              |
|                    | 186            | 223               | 223               | 269              | 126              | 132              |
| 11081_Jolanda_Ptv  | 182            | 216               | 219               | 261              | 120              | 132              |
|                    | 186            | 227               | 223               | 261              | 136              | 136              |
| 11110_Diana_Ptv    | 186            | 220               | 200               | 261              | 120              | 128              |
|                    | 198            | 227               | 200               | 261              | 136              | 132              |
| 11111_Louise_Ptv   | 182            | 223               | 200               | 261              | 120              | 136              |
|                    | 182            | 227               | 219               | 261              | 120              | 140              |
| 11112_Regina_Ptv   | 182            | 223               | 215               | 273              | 136              | 136              |
|                    | 182            | 227               | 223               | 273              | 139              | 148              |
| 11115_Susie_Ptv    | 178            | 223               | 215               | 269              | 120              | 128              |
|                    | 182            | 227               | 215               | 292              | 136              | 128              |

|                    |     |     |     |     |     |     |
|--------------------|-----|-----|-----|-----|-----|-----|
| 11160_Sonja_Ptv    | 182 | 220 | 215 | 269 | 120 | 124 |
|                    | 186 | 223 | 219 | 273 | 126 | 128 |
| 11205_Lady_Ptv     | 167 | 216 | 215 | 269 | 126 | 128 |
|                    | 199 | 231 | 219 | 269 | 136 | 132 |
| 11207_Yoko_Ptv     | 182 | 209 | 215 | 265 | 120 | 132 |
|                    | 198 | 223 | 219 | 269 | 136 | 136 |
| 11209_Wodka_Ptv    | 182 | 220 | 215 | 261 | 139 | 124 |
|                    | 182 | 223 | 219 | 269 | 139 | 128 |
| 11210_Pearl_Ptv    | 186 | 216 | 211 | 261 | 136 | 128 |
|                    | 186 | 223 | 219 | 269 | 136 | 136 |
| 11251_Sherry_Ptv   | 185 | 223 | 219 | 261 | 136 | 128 |
|                    | 185 | 227 | 230 | 261 | 136 | 132 |
| 11262_Sita_Ptv     | 182 | 216 | 211 | 265 | 120 | 132 |
|                    | 194 | 223 | 215 | 269 | 136 | 136 |
| 11300_SeppToni_Ptv | 181 | 216 | 215 | 269 | 136 | 128 |
|                    | 181 | 223 | 226 | 273 | 139 | 132 |
| 11363_Susie_Ptv    | 182 | 223 | 219 | 261 | 120 | 132 |
|                    | 182 | 231 | 226 | 261 | 136 | 136 |
| 12122_Linda_Ptv    | 182 | 223 | 211 | 262 | 120 | 128 |
|                    | 182 | 227 | 223 | 262 | 120 | 132 |
| 12113_Olga_Ptv     | 182 | 220 | 219 | 261 | 126 | 136 |
|                    | 198 | 223 | 219 | 265 | 139 | 144 |
| 10920_Moritz_Ptv   | 205 | 227 | 223 | 238 | 114 | 140 |
|                    | 205 | 227 | 255 | 250 | 114 | 140 |
| 11043_Susi_Ptt     | 191 | 223 | 196 | 266 | 126 | 140 |
|                    | 199 | 234 | 238 | 290 | 133 | 140 |
| 10892_Victoria_Ptt | 199 | 242 | 239 | 270 | 129 | 138 |
|                    | 199 | 246 | 251 | 270 | 129 | 144 |
| 10887_Brigitte_Ptt | 191 | 209 | 196 | 238 | 117 | 136 |
|                    | 191 | 213 | 251 | 273 | 117 | 148 |
| 11525_Cindy_Ptt    | 205 | 209 | 238 | 269 | 114 | 132 |
|                    | 205 | 242 | 255 | 273 | 123 | 132 |
| Aboume_Ptt         | 196 | 227 | 247 | 238 | 120 | 148 |

|                           |     |     |     |     |     |     |
|---------------------------|-----|-----|-----|-----|-----|-----|
|                           | 205 | 255 | 259 | 261 | 126 | 171 |
| Agathe_Ptt_KouilouPRC     | 192 | 227 | 255 | 261 | 123 | 140 |
|                           | 200 | 238 | 255 | 282 | 126 | 156 |
| Amelie_Ptt                | 207 | 234 | 247 | 254 | 123 | 124 |
|                           | 207 | 234 | 247 | 262 | 123 | 138 |
| Ayrton_Ptt                | 205 | 216 | 251 | 238 | 126 | 132 |
|                           | 207 | 223 | 259 | 250 | 126 | 156 |
| Bakoumba_Ptt              | 196 | 212 | 219 | 238 | 117 | 132 |
|                           | 205 | 246 | 247 | 242 | 123 | 132 |
| Benefice_Ptt              | 191 | 234 | 243 | 238 | 123 | 147 |
|                           | 203 | 246 | 243 | 254 | 136 | 161 |
| Bougnoule_Ptt_LEkoumouPRC | 190 | 223 | 247 | 238 | 114 | 128 |
|                           | 211 | 223 | 247 | 273 | 126 | 131 |
| Brigitte_Ptt              | 202 | 219 | 251 | 258 | 120 | 132 |
|                           | 211 | 238 | 255 | 261 | 123 | 132 |
| Cabinda_Ptt_CabindaPRC    | 200 | 223 | 255 | 238 | 120 | 132 |
|                           | 211 | 234 | 255 | 238 | 123 | 132 |
| Caline_Ptt_CabindaPRC     | 200 | 212 | 247 | 258 | 114 | 131 |
|                           | 220 | 242 | 247 | 269 | 120 | 131 |
| Charlotte_Ptt_KouilouPRC  | 202 | 212 | 251 | 246 | 120 | 136 |
|                           | 206 | 234 | 263 | 250 | 120 | 156 |
| Chiquita_Ptt              | 192 | 223 | 243 | 254 | 123 | 161 |
|                           | 196 | 230 | 243 | 261 | 123 | 161 |
| Choupette_Ptt_KouilouPRC  | 197 | 230 | 243 | 254 | 117 | 132 |
|                           | 200 | 242 | 249 | 261 | 120 | 132 |
| Clara_Ptt                 | 203 | 209 | 219 | 238 | 117 | 136 |
|                           | 207 | 251 | 247 | 238 | 117 | 148 |
| Dimonika_Ptt_KouilouPRC   | 192 | 205 | 196 | 238 | 120 | 131 |
|                           | 211 | 234 | 255 | 261 | 123 | 161 |
| Doris_Ptt                 | 199 | 216 | 251 | 246 | 120 | 130 |
|                           | 205 | 238 | 255 | 261 | 126 | 175 |
| Emilie_Ptt_KouilouPRC     | 200 | 234 | 219 | 238 | 114 | 132 |
|                           | 200 | 234 | 245 | 254 | 120 | 152 |

|                           |     |     |     |     |     |     |
|---------------------------|-----|-----|-----|-----|-----|-----|
| Emmanuelle_Ptt_KouilouPRC | 200 | 238 | 203 | 246 | 120 | 145 |
|                           | 220 | 242 | 247 | 266 | 133 | 149 |
| Fanny_Ptt_KouilouPRC      | 197 | 235 | 238 | 238 | 114 | 136 |
|                           | 197 | 246 | 255 | 238 | 139 | 167 |
| Fifi_Ptt                  | 196 | 220 | 200 | 246 | 126 | 136 |
|                           | 205 | 242 | 247 | 282 | 126 | 136 |
| Gina_Ptt_KouilouPRC       | 205 | 234 | 251 | 269 | 120 | 149 |
|                           | 210 | 238 | 259 | 273 | 123 | 149 |
| Hinda_Ptt_KouilouPRC      | 206 | 230 | 238 | 258 | 120 | 145 |
|                           | 207 | 238 | 251 | 269 | 126 | 145 |
| Jeanette_Ptt_KouilouPRC   | 200 | 227 | 196 | 238 | 120 | 128 |
|                           | 203 | 230 | 219 | 250 | 126 | 132 |
| Judy_Ptt                  | 196 | 223 | 215 | 246 | 114 | 166 |
|                           | 199 | 234 | 247 | 250 | 126 | 171 |
| Julie_Ptt                 | 199 | 230 | 238 | 238 | 120 | 149 |
|                           | 208 | 234 | 247 | 250 | 123 | 152 |
| Lalala_Ptt                | 185 | 238 | 219 | 242 | 120 | 131 |
|                           | 205 | 242 | 251 | 242 | 123 | 136 |
| Loubomo_Ptt_LEkoumouPRC   | 190 | 197 | 219 | 238 | 120 | 171 |
|                           | 194 | 235 | 255 | 261 | 120 | 171 |
| Makabana_Ptt_LEkoumouPRC  | 197 | 230 | 247 | 246 | 120 | 149 |
|                           | 205 | 234 | 251 | 261 | 120 | 149 |
| Makata_Ptt                | 197 | 209 | 215 | 254 | 120 | 136 |
|                           | 207 | 242 | 251 | 282 | 123 | 164 |
| Makokou_Ptt               | 196 | 209 | 245 | 238 | 117 | 132 |
|                           | 205 | 213 | 255 | 269 | 123 | 132 |
| Massabi_Ptt_CabindaPRC    | 220 | 201 | 238 | 238 | 123 | 131 |
|                           | 224 | 238 | 259 | 262 | 136 | 167 |
| Masuku_Ptt                | 191 | 209 | 196 | 262 | 117 | 113 |
|                           | 210 | 216 | 253 | 262 | 123 | 128 |
| Matalila_Ptt_LEkoumouPRC  | 192 | 216 | 239 | 238 | 120 | 148 |
|                           | 208 | 223 | 255 | 258 | 139 | 156 |
| Moanda_Ptt                | 191 | 219 | 196 | 258 | 120 | 132 |

|                             |     |     |     |     |     |     |
|-----------------------------|-----|-----|-----|-----|-----|-----|
|                             | 218 | 227 | 255 | 266 | 126 | 132 |
| Morphee_Ptt                 | 197 | 234 | 238 | 238 | 120 | 143 |
|                             | 205 | 238 | 245 | 266 | 123 | 152 |
| Mossenjo_Ptt_LEkoumouPRC    | 200 | 197 | 196 | 238 | 120 | 136 |
|                             | 200 | 238 | 255 | 258 | 120 | 149 |
| Mpassa_Ptt                  | 200 | 209 | 215 | 238 | 117 | 170 |
|                             | 205 | 234 | 247 | 246 | 123 | 170 |
| Mvadi_Ptt                   | 196 | 209 | 243 | 257 | 120 | 140 |
|                             | 196 | 227 | 243 | 262 | 120 | 140 |
| Noemie_Ptt_EQ               | 197 | 235 | 245 | 246 | 120 | 124 |
|                             | 197 | 242 | 255 | 246 | 120 | 124 |
| Pepere_Ptt_KouilouPRC       | 200 | 230 | 203 | 246 | 120 | 128 |
|                             | 200 | 234 | 203 | 270 | 126 | 167 |
| Rosette_Ptt_LEkoumouPRC     | 198 | 212 | 255 | 246 | 114 | 149 |
|                             | 212 | 242 | 263 | 266 | 126 | 149 |
| Sibiti_Ptt_LEkoumouPRC      | 200 | 201 | 196 | 266 | 126 | 148 |
|                             | 200 | 227 | 196 | 270 | 139 | 161 |
| Sophie_Ptt_KouilouPRC       | 206 | 212 | 255 | 238 | 120 | 156 |
|                             | 211 | 238 | 259 | 258 | 126 | 156 |
| Stephanie_Ptt_KouilouPRC    | 203 | 223 | 239 | 238 | 123 | 131 |
|                             | 220 | 238 | 251 | 270 | 129 | 148 |
| Teo_Ptt_LEkoumouPRC         | 192 | 230 | 223 | 258 | 126 | 140 |
|                             | 192 | 234 | 243 | 258 | 126 | 149 |
| Vaillant_Ptt_Gabon          | 200 | 220 | 219 | 254 | 123 | 130 |
|                             | 205 | 238 | 251 | 269 | 129 | 143 |
| Yvette_Ptt_Congo_KouilouPRC | 208 | 216 | 251 | 250 | 120 | 131 |
|                             | 211 | 216 | 251 | 250 | 120 | 131 |
| 12231_No_Pts                | 199 | 210 | 245 | 261 | 126 | 166 |
|                             | 211 | 238 | 251 | 261 | 133 | 166 |
| 12232_Ni_Pts                | 199 | 209 | 247 | 278 | 120 | 136 |
|                             | 207 | 216 | 251 | 290 | 126 | 140 |
| 11784_Paula_Pts             | 197 | 242 | 219 | 246 | 120 | 166 |
|                             | 197 | 246 | 239 | 270 | 126 | 166 |

|                         |     |     |     |     |     |     |
|-------------------------|-----|-----|-----|-----|-----|-----|
| 11785_Exota_Pts         | 197 | 209 | 247 | 242 | 133 | 166 |
|                         | 207 | 224 | 251 | 258 | 136 | 166 |
| Asega_Pts_DRC           | 196 | 205 | 243 | 258 | 111 | 132 |
|                         | 211 | 234 | 251 | 266 | 120 | 132 |
| Baluku_Pts_DRC          | 199 | 205 | 247 | 250 | 123 | 136 |
|                         | 203 | 209 | 247 | 266 | 129 | 166 |
| Becky_Pts_Uganda        | 196 | 230 | 255 | 261 | 126 | 166 |
|                         | 199 | 242 | 255 | 266 | 133 | 166 |
| Billi_Pts_DRC           | 197 | 213 | 239 | 254 | 111 | 132 |
|                         | 200 | 238 | 251 | 281 | 111 | 136 |
| Bwambale_Pts_Uganda     | 199 | 205 | 243 | 262 | 120 | 132 |
|                         | 203 | 238 | 251 | 262 | 126 | 166 |
| Cindy_Pts_BudongoUganda | 203 | 230 | 255 | 250 | 126 | 136 |
|                         | 207 | 230 | 255 | 267 | 133 | 140 |
| Connie_Pts_Uganda       | 197 | 205 | 255 | 283 | 133 | 132 |
|                         | 208 | 242 | 255 | 294 | 133 | 132 |
| Eddy_Pts_KibaleUganda   | 196 | 227 | 245 | 262 | 133 | 132 |
|                         | 199 | 230 | 251 | 281 | 136 | 136 |
| Ikuru_Pts_DRC           | 199 | 197 | 243 | 246 | 120 | 124 |
|                         | 205 | 216 | 243 | 258 | 136 | 136 |
| Indi_Pts_DRC            | 199 | 230 | 239 | 254 | 120 | 132 |
|                         | 207 | 238 | 243 | 261 | 120 | 149 |
| Kalema_Pts_DRC          | 199 | 201 | 243 | 254 | 120 | 136 |
|                         | 220 | 205 | 255 | 261 | 129 | 143 |
| Kidongo_Pts_DRC         | 205 | 209 | 235 | 261 | 120 | 132 |
|                         | 207 | 230 | 235 | 261 | 126 | 136 |
| Kisembo_Pts_DRC         | 191 | 209 | 251 | 246 | 126 | 128 |
|                         | 200 | 216 | 251 | 265 | 136 | 136 |
| Maisko_Pts_DRC          | 196 | 146 | 251 | 250 | 120 | 136 |
|                         | 205 | 209 | 255 | 258 | 120 | 166 |
| Mawa_Pts_DRC            | 199 | 146 | 255 | 254 | 120 | 140 |
|                         | 220 | 201 | 255 | 285 | 120 | 167 |
| Megan_Pts_Rwanda        | 196 | 238 | 247 | 254 | 120 | 166 |

|                          |     |     |     |     |     |     |
|--------------------------|-----|-----|-----|-----|-----|-----|
|                          | 207 | 242 | 251 | 254 | 133 | 166 |
| Mgbadolite_Pts_DRC       | 200 | 234 | 243 | 261 | 120 | 132 |
|                          | 224 | 251 | 259 | 265 | 133 | 132 |
| nakuu_Pts_DRC            | 196 | 230 | 242 | 242 | 126 | 132 |
|                          | 207 | 230 | 247 | 261 | 139 | 132 |
| nani_Pts                 | 203 | 242 | 243 | 261 | 136 | 135 |
|                          | 211 | 242 | 251 | 266 | 136 | 146 |
| natasha_Pts_KibaleUganda | 205 | 234 | 242 | 246 | 120 | 128 |
|                          | 220 | 238 | 251 | 254 | 126 | 132 |
| Nkuumwa_Pts_Uganda       | 207 | 234 | 249 | 261 | 117 | 132 |
|                          | 211 | 238 | 249 | 282 | 129 | 182 |
| Okech_Pts                | 207 | 213 | 247 | 258 | 120 | 132 |
|                          | 220 | 216 | 251 | 290 | 136 | 136 |
| Pasa_Pts_DRC             | 199 | 209 | 251 | 281 | 126 | 136 |
|                          | 203 | 238 | 251 | 283 | 136 | 143 |
| Robbie_Pts_DRC           | 196 | 213 | 245 | 261 | 123 | 132 |
|                          | 196 | 238 | 251 | 266 | 126 | 136 |
| Sophie_Pts               | 205 | 216 | 242 | 261 | 117 | 166 |
|                          | 205 | 238 | 251 | 279 | 120 | 186 |
| Sunday_Pts_DRC           | 199 | 242 | 243 | 258 | 126 | 140 |
|                          | 199 | 246 | 243 | 290 | 133 | 140 |
| Tumbo_Pts_KibaleUganda   | 199 | 230 | 245 | 246 | 120 | 131 |
|                          | 199 | 242 | 251 | 266 | 133 | 136 |
| Umugenzi_Pts_DRC         | 191 | 213 | 239 | 242 | 126 | 131 |
|                          | 199 | 234 | 247 | 266 | 129 | 135 |
| Umutama_Pts_DRC          | 199 | 230 | 247 | 266 | 120 | 128 |
|                          | 203 | 234 | 247 | 266 | 126 | 132 |
| Yoyo_Pts_DRC             | 199 | 205 | 219 | 258 | 126 | 132 |
|                          | 199 | 238 | 242 | 278 | 133 | 136 |



| <b>GATA14E09</b> | <b>GATA116B01N</b> | <b>GATA50G06</b> | <b>UT7544</b> | <b>GGAA21G11L</b> | <b>GATA28F03</b> | <b>TCTA017M</b> | <b>AGAT120</b> |
|------------------|--------------------|------------------|---------------|-------------------|------------------|-----------------|----------------|
| 181              | 145                | 206              | 155           | 166               | 247              | 189             | 278            |
| 193              | 188                | 210              | 155           | 174               | 251              | 197             | 278            |
| 181              | 161                | 198              | 155           | 166               | 247              | 178             | 282            |
| 181              | 161                | 210              | 157           | 170               | 251              | 185             | 282            |
| 181              | 145                | 210              | 155           | 170               | 255              | 162             | 278            |
| 185              | 145                | 214              | 169           | 170               | 255              | 189             | 286            |
| 181              | 145                | 206              | 157           | 174               | 251              | 189             | 253            |
| 197              | 145                | 210              | 169           | 178               | 251              | 193             | 270            |
| 189              | 161                | 210              | 157           | 154               | 247              | 182             | 258            |
| 193              | 184                | 214              | 165           | 162               | 255              | 186             | 282            |
| 181              | 161                | 202              | 155           | 166               | 247              | 189             | 249            |
| 181              | 184                | 218              | 155           | 170               | 251              | 189             | 282            |
| 181              | 161                | 210              | 155           | 162               | 247              | 185             | 274            |
| 193              | 188                | 214              | 165           | 166               | 251              | 193             | 278            |
| 181              | 181                | 202              | 155           | 166               | 247              | 185             | 253            |
| 181              | 184                | 210              | 161           | 170               | 255              | 185             | 282            |
| 181              | 161                | 202              | 155           | 162               | 247              | 162             | 262            |
| 189              | 177                | 214              | 165           | 182               | 251              | 185             | 262            |
| 181              | 145                | 210              | 155           | 170               | 251              | 178             | 278            |
| 193              | 184                | 214              | 165           | 182               | 251              | 193             | 278            |
| 181              | 161                | 210              | 155           | 166               | 247              | 189             | 253            |
| 181              | 184                | 214              | 165           | 186               | 255              | 197             | 265            |
| 181              | 145                | 210              | 155           | 178               | 247              | 189             | 265            |
| 193              | 181                | 222              | 155           | 182               | 255              | 189             | 278            |
| 181              | 161                | 210              | 155           | 162               | 255              | 189             | 274            |
| 197              | 184                | 214              | 165           | 178               | 255              | 189             | 278            |
| 189              | 161                | 202              | 155           | 162               | 247              | 189             | 278            |
| 197              | 184                | 214              | 157           | 178               | 255              | 193             | 282            |
| 181              | 161                | 202              | 155           | 162               | 251              | 162             | 262            |
| 181              | 184                | 210              | 161           | 170               | 255              | 189             | 278            |

|     |     |     |     |     |     |     |     |
|-----|-----|-----|-----|-----|-----|-----|-----|
| 181 | 145 | 206 | 155 | 162 | 247 | 182 | 265 |
| 193 | 184 | 210 | 169 | 178 | 247 | 189 | 265 |
| 181 | 145 | 202 | 155 | 166 | 247 | 178 | 265 |
| 193 | 184 | 214 | 161 | 178 | 255 | 189 | 278 |
| 181 | 184 | 210 | 155 | 162 | 251 | 185 | 253 |
| 197 | 188 | 214 | 169 | 166 | 255 | 185 | 270 |
| 181 | 161 | 206 | 165 | 162 | 247 | 189 | 265 |
| 193 | 184 | 222 | 169 | 170 | 251 | 189 | 265 |
| 181 | 161 | 210 | 165 | 170 | 247 | 185 | 253 |
| 193 | 184 | 214 | 165 | 174 | 247 | 189 | 253 |
| 181 | 184 | 210 | 155 | 166 | 247 | 189 | 262 |
| 189 | 184 | 218 | 161 | 170 | 255 | 193 | 265 |
| 181 | 161 | 210 | 155 | 162 | 247 | 177 | 278 |
| 189 | 184 | 222 | 155 | 182 | 247 | 197 | 278 |
| 185 | 145 | 210 | 155 | 170 | 247 | 189 | 278 |
| 193 | 161 | 218 | 155 | 178 | 247 | 197 | 278 |
| 181 | 149 | 210 | 155 | 166 | 247 | 181 | 265 |
| 181 | 157 | 214 | 159 | 170 | 251 | 193 | 278 |
| 181 | 145 | 210 | 155 | 158 | 247 | 185 | 278 |
| 197 | 184 | 214 | 169 | 170 | 251 | 193 | 278 |
| 181 | 145 | 206 | 155 | 162 | 227 | 189 | 278 |
| 185 | 145 | 210 | 155 | 166 | 247 | 197 | 278 |
| 197 | 169 | 206 | 153 | 166 | 248 | 177 | 274 |
| 200 | 173 | 210 | 166 | 174 | 248 | 177 | 289 |
| 181 | 154 | 210 | 153 | 137 | -9  | 189 | 262 |
| 204 | 157 | 222 | 165 | 145 | -9  | 189 | 289 |
| 181 | 145 | 222 | 153 | 145 | 263 | 181 | 274 |
| 200 | 149 | 226 | 161 | 158 | 263 | 185 | 278 |
| 181 | 165 | 210 | 158 | 141 | 271 | 181 | 274 |
| 193 | 199 | 238 | 173 | 162 | 271 | 193 | 282 |
| 193 | 169 | 214 | 161 | 141 | 244 | 181 | 274 |
| 200 | 184 | 218 | 173 | 162 | 248 | 185 | 274 |
| 197 | 173 | 202 | 153 | 137 | 259 | 193 | 262 |

|     |     |     |     |     |     |     |     |
|-----|-----|-----|-----|-----|-----|-----|-----|
| 208 | 184 | 226 | 157 | 158 | 263 | 197 | 265 |
| 204 | 165 | 210 | 161 | 170 | 256 | 189 | 265 |
| 204 | 173 | 210 | 166 | 170 | 263 | 193 | 281 |
| 181 | 145 | 210 | 161 | 141 | 259 | 193 | 265 |
| 204 | 169 | 218 | 169 | 158 | 259 | 197 | 278 |
| 181 | 154 | 218 | 157 | 166 | 255 | 189 | 270 |
| 193 | 173 | 226 | 161 | 170 | 255 | 189 | 289 |
| 204 | 154 | 210 | 161 | 145 | 248 | 177 | 278 |
| 204 | 173 | 210 | 165 | 145 | 255 | 189 | 281 |
| -9  | 165 | 222 | 157 | 141 | 248 | 193 | 278 |
| -9  | 165 | 226 | 157 | 158 | 255 | 193 | 289 |
| 193 | 173 | 206 | 161 | 137 | 239 | 181 | 265 |
| 200 | 203 | 214 | 161 | 141 | 251 | 192 | 282 |
| 193 | 154 | 202 | 148 | 137 | 248 | 177 | 281 |
| 197 | 169 | 234 | 165 | 154 | 248 | 185 | 285 |
| 197 | 154 | 210 | 161 | 141 | 244 | 193 | -9  |
| 200 | 165 | 210 | 165 | 150 | 244 | 193 | -9  |
| 189 | 156 | 218 | -9  | 150 | 255 | 185 | 278 |
| 193 | 165 | 222 | -9  | 162 | 263 | 197 | 278 |
| 181 | 145 | 206 | 153 | 145 | 239 | 193 | 281 |
| 204 | 165 | 226 | 169 | 145 | 244 | 193 | 281 |
| 197 | 156 | 198 | 161 | 137 | 243 | 181 | 265 |
| 204 | 177 | 202 | 165 | 150 | 243 | 189 | 278 |
| 193 | 154 | 226 | 165 | 150 | -9  | 193 | 262 |
| 197 | 184 | 230 | 165 | 162 | -9  | 197 | 274 |
| 193 | 156 | 218 | 165 | 137 | 244 | 189 | 265 |
| 200 | 173 | 238 | 165 | 137 | 248 | 197 | 274 |
| 204 | 165 | 210 | 158 | 170 | 255 | 174 | 281 |
| 204 | 169 | 226 | 162 | 170 | 263 | 193 | 285 |
| 181 | 154 | 202 | 165 | 137 | 248 | 193 | 270 |
| 193 | 156 | 214 | 169 | 162 | 267 | 193 | 270 |
| 200 | 173 | 202 | 154 | 162 | 255 | 186 | 265 |
| 211 | 177 | 218 | 168 | 170 | 255 | 189 | 281 |

|     |     |     |     |     |     |     |     |
|-----|-----|-----|-----|-----|-----|-----|-----|
| 197 | 154 | 210 | 158 | 158 | 248 | 181 | 253 |
| 200 | 165 | 214 | 169 | 158 | 252 | 193 | 278 |
| 189 | 154 | 210 | 158 | 150 | 247 | 181 | 274 |
| 200 | 154 | 214 | 161 | 166 | 256 | 193 | 282 |
| 193 | 154 | 226 | 165 | 145 | 247 | 189 | 282 |
| 200 | 195 | 230 | 165 | 158 | 255 | 189 | 285 |
| 181 | 154 | 210 | 153 | 166 | 244 | 177 | 265 |
| 200 | 165 | 214 | 165 | 174 | 256 | 181 | 278 |
| 197 | 154 | 214 | 169 | 170 | 248 | 181 | 274 |
| 200 | 162 | 226 | 173 | 174 | 251 | 192 | 281 |
| 193 | 165 | 214 | 165 | 166 | 244 | 177 | 270 |
| 200 | 173 | 214 | 165 | 166 | 244 | 189 | 285 |
| 181 | 154 | 226 | 144 | 150 | 247 | 181 | 281 |
| 197 | 154 | 230 | 161 | 186 | 255 | 193 | 285 |
| 193 | 157 | 214 | 169 | 137 | 243 | 185 | 278 |
| 200 | 162 | 214 | 172 | 162 | 255 | 188 | 278 |
| 193 | 154 | 214 | 165 | 137 | 267 | 193 | 265 |
| 204 | 161 | 238 | 172 | 154 | 267 | 197 | 270 |
| 200 | 154 | 210 | 148 | 154 | 251 | 181 | 278 |
| 204 | 169 | 210 | 168 | 182 | 256 | 190 | 285 |
| 193 | 149 | 222 | 165 | 154 | 255 | 189 | 281 |
| 204 | 156 | 238 | 169 | 170 | 255 | 193 | 281 |
| 181 | 165 | 230 | 153 | 137 | 239 | 185 | 270 |
| 197 | 165 | 234 | 165 | 137 | 259 | 192 | 285 |
| 181 | 165 | 187 | 153 | 137 | 244 | 193 | 274 |
| 204 | 173 | 226 | 158 | 141 | 244 | 193 | 278 |
| 197 | 157 | 206 | 153 | 162 | 248 | 177 | 274 |
| 204 | 184 | 210 | 153 | 166 | 255 | 193 | 282 |
| 197 | 154 | 210 | 169 | 166 | 248 | 185 | 281 |
| 200 | 154 | 226 | 169 | 170 | 252 | 189 | 285 |
| 200 | 156 | 210 | 165 | 145 | 256 | 181 | 278 |
| 204 | 162 | 214 | 165 | 154 | 263 | 193 | 289 |
| 185 | 140 | 223 | 157 | 137 | 247 | 185 | 285 |

|     |     |     |     |     |     |     |     |
|-----|-----|-----|-----|-----|-----|-----|-----|
| 197 | 177 | 226 | 157 | 162 | 251 | 185 | 285 |
| 189 | 173 | 206 | 157 | 137 | 255 | 193 | 265 |
| 200 | 177 | 230 | 161 | 174 | 259 | 193 | 278 |
| 185 | 165 | 223 | 154 | 150 | 239 | 185 | 270 |
| 193 | 177 | 234 | 165 | 170 | 255 | 193 | 274 |
| 185 | 161 | 210 | 154 | 158 | -9  | 185 | 278 |
| 208 | 165 | 218 | 154 | 162 | -9  | 185 | 285 |
| 181 | 165 | 218 | 161 | 158 | 239 | 185 | 270 |
| 189 | 173 | 222 | 169 | 162 | 248 | 193 | 278 |
| 193 | 165 | 210 | 172 | 137 | 255 | 197 | 265 |
| 197 | 188 | 234 | 172 | 158 | 267 | 200 | 278 |
| 189 | 156 | 206 | 161 | 158 | 248 | 193 | 282 |
| 197 | 165 | 266 | 165 | 166 | 252 | 193 | 282 |
| 181 | 156 | 230 | 165 | 141 | 244 | 189 | 270 |
| 200 | 177 | 238 | 165 | 178 | 255 | 189 | 281 |
| 193 | 154 | 198 | 148 | 162 | 267 | 181 | 282 |
| 193 | 169 | 223 | 165 | 170 | 267 | 189 | 285 |
| 181 | 165 | 214 | 166 | 154 | 248 | 189 | 265 |
| 200 | 177 | 222 | 169 | 166 | 252 | 189 | 281 |
| 197 | 165 | 210 | 153 | 137 | 255 | 177 | 270 |
| 197 | 173 | 210 | 158 | 158 | 267 | 193 | 274 |
| 181 | 154 | 214 | 161 | 145 | 248 | 193 | 265 |
| 200 | 165 | 231 | 165 | 170 | 256 | 193 | 265 |
| 193 | 165 | 222 | 153 | 137 | 244 | 181 | 274 |
| 204 | 173 | 222 | 161 | 137 | 244 | 189 | 282 |
| 181 | 154 | 226 | 144 | 178 | 255 | 193 | 270 |
| 204 | 177 | 230 | 158 | 190 | 255 | 193 | 281 |
| 197 | 156 | 214 | 161 | 141 | 247 | 189 | 274 |
| 197 | 184 | 226 | 169 | 141 | 255 | 193 | 274 |
| 189 | 184 | 222 | 161 | 145 | 255 | 189 | 270 |
| 197 | 184 | 234 | 169 | 158 | 255 | 189 | 274 |
| 189 | 156 | 218 | 161 | 145 | 263 | 189 | 265 |
| 189 | 173 | 234 | 165 | 154 | 267 | 197 | 270 |

|     |     |     |     |     |     |     |     |
|-----|-----|-----|-----|-----|-----|-----|-----|
| 189 | 154 | 234 | 154 | 145 | 260 | 193 | 265 |
| 193 | 156 | 238 | 161 | 150 | 263 | 193 | 278 |
| 189 | 154 | 198 | 161 | 145 | 252 | 193 | 262 |
| 193 | 157 | 226 | 169 | 170 | 260 | 197 | 274 |
| 185 | 181 | 218 | 169 | 162 | 248 | 189 | 258 |
| 189 | 181 | 230 | 169 | 174 | 248 | 193 | 274 |
| 193 | 173 | 238 | 165 | 166 | 251 | 185 | 265 |
| 193 | 184 | 242 | 173 | 174 | 251 | 193 | 274 |
| 185 | 154 | 222 | 165 | 141 | 248 | 193 | 265 |
| 193 | 154 | 226 | 170 | 145 | 255 | 193 | 274 |
| 189 | 173 | 198 | 165 | 162 | 251 | 193 | 274 |
| 193 | 180 | 202 | 165 | 170 | 251 | 193 | 274 |
| 193 | 161 | 226 | 157 | 145 | 252 | 177 | 265 |
| 193 | 165 | 234 | 165 | 145 | 252 | 181 | 265 |
| 189 | 154 | -9  | 161 | 145 | 263 | 182 | 265 |
| 193 | 156 | -9  | 169 | 174 | 263 | 193 | 265 |
| 193 | 154 | 230 | 169 | 158 | 252 | 181 | 265 |
| 197 | 156 | 234 | 173 | 166 | 252 | 193 | 265 |
| 185 | 154 | 218 | 169 | 145 | 252 | 189 | 270 |
| 197 | 188 | 226 | 173 | 178 | 252 | 189 | 274 |
| 193 | 149 | 226 | 165 | 145 | 255 | 193 | 270 |
| 193 | 154 | 234 | 165 | 158 | 263 | 193 | 274 |
| 189 | 177 | 210 | 161 | 141 | 255 | 181 | 262 |
| 197 | 184 | 214 | 165 | 162 | 255 | 193 | 274 |
| 185 | 161 | 226 | 161 | 141 | 252 | 189 | 265 |
| 197 | 173 | 230 | 166 | 170 | 252 | 193 | 265 |
| 189 | 149 | 202 | 161 | 141 | 256 | 189 | 270 |
| 189 | 154 | 218 | 180 | 145 | 256 | 193 | 274 |
| 189 | 154 | 222 | 154 | 145 | 256 | 193 | 265 |
| 197 | 161 | 234 | 169 | 162 | 256 | 193 | 274 |
| 189 | 154 | 202 | 154 | 166 | 248 | 177 | 265 |
| 189 | 169 | 234 | 165 | 170 | 248 | 185 | 270 |
| 193 | 154 | 226 | 158 | 145 | 255 | 177 | 270 |

|     |     |     |     |     |     |     |     |
|-----|-----|-----|-----|-----|-----|-----|-----|
| 193 | 156 | 230 | 161 | 145 | 255 | 185 | 274 |
| 189 | 149 | 226 | 154 | 141 | 239 | 193 | 274 |
| 189 | 154 | 226 | 169 | 158 | 239 | 193 | 274 |
| 189 | 149 | 222 | 169 | 158 | 239 | 189 | 265 |
| 193 | 154 | 234 | 169 | 162 | 239 | 189 | 274 |
| 189 | 188 | 214 | 165 | 170 | 255 | 185 | 262 |
| 189 | 188 | 234 | 173 | 170 | 259 | 185 | 274 |
| 189 | 149 | 218 | 161 | 141 | 256 | 189 | 265 |
| 197 | 154 | 226 | 165 | 145 | 260 | 197 | 265 |
| 185 | 149 | 226 | 157 | 154 | 239 | 181 | 262 |
| 189 | 154 | 230 | 165 | 162 | 239 | 181 | 265 |
| 189 | 154 | 214 | 154 | 141 | 247 | 185 | 265 |
| 189 | 154 | 218 | 165 | 166 | 247 | 193 | 282 |
| 193 | 154 | 230 | 157 | 145 | 263 | 185 | 270 |
| 193 | 173 | 234 | 161 | 158 | 263 | 189 | 274 |
| 193 | 154 | 202 | 165 | 162 | 263 | 181 | 265 |
| 204 | 184 | 238 | 169 | 170 | 263 | 189 | 265 |
| 185 | 154 | 222 | 161 | 145 | 255 | 185 | 270 |
| 185 | 166 | 230 | 169 | 166 | 255 | 189 | 274 |
| 193 | 169 | 214 | 157 | 141 | 251 | 185 | 270 |
| 197 | 184 | 218 | 166 | 162 | 263 | 185 | 270 |
| 193 | 154 | 230 | 161 | 158 | 255 | 177 | 270 |
| 193 | 156 | 234 | 170 | 166 | 255 | 181 | 282 |
| 193 | 154 | 210 | 161 | 158 | 255 | 181 | 262 |
| 197 | 184 | 226 | 173 | 162 | 255 | 197 | 265 |
| 185 | 154 | 214 | 153 | 145 | 243 | 185 | 270 |
| 193 | 156 | 234 | 157 | 170 | 255 | 185 | 274 |
| 189 | 161 | 210 | 169 | 158 | 239 | 189 | 270 |
| 197 | 173 | 230 | 169 | 158 | 255 | 193 | 274 |

| <b>GATA25A04</b> | <b>GATA129D11N</b> | <b>GATA8C04</b> | <b>ATA11D10M</b> | <b>GATA68A03</b> | <b>GATA24F03</b> | <b>GATA29F06z</b> | <b>GATA4D07</b> |
|------------------|--------------------|-----------------|------------------|------------------|------------------|-------------------|-----------------|
| 194              | 113                | 202             | 137              | 290              | 178              | 244               | 243             |
| 202              | 113                | 210             | 140              | 324              | 178              | 244               | 247             |
| 189              | 113                | 202             | 131              | 307              | 159              | 244               | 239             |
| 197              | 113                | 206             | 137              | 311              | 159              | 244               | 243             |
| 190              | 113                | 194             | 137              | 311              | 174              | 244               | 231             |
| 194              | 113                | 206             | 140              | 316              | 174              | 244               | 239             |
| 198              | 113                | 198             | 137              | 320              | 170              | 244               | 227             |
| 198              | 113                | 210             | 137              | 324              | 174              | 244               | 239             |
| 194              | 113                | 206             | 140              | 311              | 174              | 244               | 227             |
| 198              | 113                | 206             | 140              | 324              | 174              | 244               | 227             |
| 193              | 113                | 198             | 137              | 316              | 178              | 240               | 239             |
| 197              | 113                | 202             | 137              | 324              | 178              | 244               | 243             |
| 193              | 113                | 202             | 131              | 273              | 166              | 240               | 223             |
| 198              | 113                | 206             | 137              | 320              | 166              | 244               | 227             |
| 194              | 113                | 202             | 140              | 313              | 174              | 244               | 218             |
| 198              | 113                | 206             | 140              | 325              | 178              | 244               | 223             |
| 194              | 113                | 194             | 140              | 286              | 166              | 244               | 235             |
| 194              | 113                | 210             | 140              | 290              | 178              | 244               | 239             |
| 194              | 113                | 202             | 140              | 316              | 166              | 244               | 227             |
| 198              | 113                | 206             | 140              | 320              | 174              | 244               | 227             |
| 198              | 113                | 206             | 137              | 311              | 174              | 244               | 227             |
| 198              | 113                | 210             | 140              | 324              | 174              | 244               | 239             |
| 186              | 113                | 194             | 140              | 311              | 174              | 244               | 231             |
| 194              | 113                | 210             | 140              | 320              | 174              | 248               | 247             |
| 194              | 113                | 202             | 137              | 311              | 160              | 244               | 227             |
| 194              | 113                | 206             | 140              | 320              | 160              | 255               | 243             |
| 193              | 113                | 201             | 131              | 273              | 160              | 240               | 227             |
| 198              | 113                | 206             | 137              | 307              | 160              | 244               | 239             |
| 198              | 113                | 206             | 131              | 324              | 166              | 240               | 227             |
| 198              | 113                | 210             | 140              | 328              | 166              | 258               | 243             |



|     |     |     |     |     |     |     |     |
|-----|-----|-----|-----|-----|-----|-----|-----|
| 194 | 113 | 201 | 140 | 282 | 174 | 244 | 239 |
| 194 | 113 | 206 | 140 | 320 | 174 | 244 | 247 |
| 194 | 113 | 202 | 137 | 311 | 168 | 244 | 227 |
| 194 | 113 | 202 | 140 | 328 | 168 | 244 | 247 |
| 190 | 113 | 201 | 140 | 307 | 160 | 244 | 227 |
| 194 | 113 | 210 | 140 | 311 | 160 | 248 | 239 |
| 194 | 113 | 202 | 140 | 282 | 166 | 244 | 227 |
| 197 | 113 | 202 | 140 | 320 | 166 | 244 | 239 |
| 194 | 113 | 202 | 137 | 316 | 174 | 244 | 243 |
| 198 | 113 | 206 | 137 | 324 | 174 | 248 | 247 |
| 197 | 113 | 194 | 140 | 307 | 160 | 244 | 211 |
| 201 | 113 | 201 | 142 | 320 | 160 | 258 | 227 |
| 194 | 101 | 201 | 140 | 316 | 156 | 244 | 235 |
| 198 | 113 | 206 | 140 | 320 | 182 | 244 | 235 |
| 186 | 113 | 198 | 136 | 316 | 173 | 240 | 227 |
| 194 | 113 | 206 | 142 | 328 | 173 | 244 | 231 |
| 194 | 113 | 201 | 131 | 320 | 165 | 244 | 218 |
| 201 | 113 | 210 | 131 | 324 | 173 | 248 | 243 |
| 194 | 113 | 201 | 137 | 316 | 169 | 244 | 223 |
| 198 | 113 | 206 | 140 | 328 | 173 | 244 | 223 |
| 198 | 101 | 198 | 131 | 321 | 160 | 244 | 227 |
| 198 | 113 | 206 | 140 | 325 | 160 | 244 | 247 |
| 197 | 117 | 202 |     |     |     |     |     |
| 205 | 120 | 206 | 126 | 279 | 144 | 244 | 247 |
| 193 | 117 | 210 | 132 | 349 | 177 | 244 | 251 |
| 209 | 117 | 214 | 132 | 290 | 182 | 243 | 218 |
| 181 | 120 | 202 | 144 | 341 | 182 | 246 | 218 |
| 201 | 124 | 210 | 129 | 337 | 178 | 244 | 239 |
| 194 | 117 | 206 | 132 | 356 | 178 | 247 | 243 |
| 197 | 120 | 210 | 141 | 320 | 178 | 244 | 231 |
| 190 | 117 | 214 | 141 | 341 | 178 | 244 | 247 |
| 197 | 124 | 214 | 126 | 325 | 153 | 240 | 227 |
| 197 | 117 | 206 | 126 | 360 | 161 | 248 | 239 |

|     |     |     |     |     |     |     |     |
|-----|-----|-----|-----|-----|-----|-----|-----|
| 197 | 120 | 206 | 138 | 321 | 162 | 244 | 235 |
| 197 | 117 | 206 | 141 | 349 | 176 | 244 | 239 |
| 209 | 117 | 206 | 132 | 325 | 166 | 244 | 235 |
| 197 | 117 | 206 | 144 | 353 | 174 | 244 | 243 |
| 206 | 124 | 210 | 132 | 329 | 180 | 240 | 235 |
| 193 | 117 | 194 | 144 | 329 | 182 | 244 | 247 |
| 198 | 124 | 206 | 132 | 279 | 144 | 240 | 239 |
| 198 | 117 | 202 | 138 | 287 | 177 | 246 | 239 |
| 198 | 117 | 210 | 126 | 271 | 153 | 240 | 223 |
| 197 | 117 | 206 | 132 | 283 | 179 | 244 | 239 |
| 205 | 120 | 210 | 126 | 266 | 153 | 244 | 239 |
| 197 | 117 | 199 | 129 | 287 | 173 | 247 | 243 |
| 217 | 120 | 206 | 126 | 317 | 174 | 255 | 239 |
| 198 | 117 | 202 | 144 | 349 | 174 | 262 | 251 |
| 198 | 120 | 214 | 141 | 287 | 154 | 228 | 235 |
| 201 | 113 | 207 | 141 | 317 | 178 | 244 | 243 |
| 205 | 124 | 211 | 132 | 283 | 162 | 228 | 239 |
| 190 | 120 | 207 | 141 | 287 | 174 | 244 | 243 |
| 213 | 124 | 215 | 132 | 353 | 154 | 246 | 231 |
| 190 | 120 | 199 | 132 | 353 | 174 | 251 | 247 |
| 205 | 124 | 211 | 138 | 317 | 174 | 228 | 235 |
| 201 | 120 | 206 | 144 | 349 | 174 | 236 | 247 |
| 205 | 120 | 210 | 126 | 329 | 162 | 244 | 231 |
| 170 | 120 | 207 | 129 | 356 | 174 | 244 | 247 |
| 170 | 124 | 215 | 138 | 317 | 182 | 236 | 227 |
| 198 | 117 | 214 | 144 | 349 | 182 | 240 | 227 |
| 198 | 117 | 214 | 132 | 325 | 170 | 247 | 227 |
| 193 | 117 | 199 | 138 | 325 | 174 | 247 | 239 |
| 198 | 117 | 207 | 126 | 317 | 178 | 228 | 223 |
| 197 | 117 | 194 | 129 | 326 | 178 | 236 | 247 |
| 201 | 117 | 202 | 129 | 283 | 178 | 244 | 226 |
| 201 | 117 | 203 | 132 | 325 | 182 | 246 | 235 |
| 201 | 120 | 210 | 126 | 283 | 170 | 232 | 223 |

|     |     |     |     |     |     |     |     |
|-----|-----|-----|-----|-----|-----|-----|-----|
| 197 | 117 | 206 | 138 | 325 | 174 | 244 | 239 |
| 202 | 120 | 207 | 126 | 329 | 154 | 243 | 231 |
| 201 | 117 | 211 | 126 | 349 | 154 | 243 | 243 |
| 205 | 124 | 211 | 123 | 279 | 174 | 243 | 247 |
| 197 | 113 | 190 | 126 | 283 | 178 | 243 | 247 |
| 201 | 117 | 206 | 126 | 271 | 173 | 240 | 235 |
| 194 | 117 | 203 | 141 | 283 | 173 | 244 | 235 |
| 198 | 124 | 215 | 129 | 279 | 162 | 244 | 239 |
| 197 | 117 | 211 | 132 | 283 | 178 | 252 | 239 |
| 217 | 120 | 211 | 126 | 341 | 154 | 244 | 243 |
| 178 | 120 | 207 | 132 | 357 | 166 | 248 | 243 |
| 217 | 120 | 207 | 129 | 283 | 154 | 244 | 239 |
| 205 | 113 | 198 | 138 | 334 | 174 | 244 | 247 |
| 205 | 117 | 206 | 132 | 290 | 149 | 228 | 239 |
| 197 | 117 | 206 | 144 | 290 | 149 | 248 | 247 |
| 213 | 117 | 210 | 132 | 283 | 153 | 244 | 227 |
| 198 | 117 | 206 | 141 | 329 | 173 | 244 | 247 |
| 205 | 117 | 214 | 132 | 265 | 153 | 243 | 231 |
| 198 | 117 | 207 | 141 | 344 | 177 | 248 | 231 |
| 198 | 117 | 215 | 129 | 341 | 170 | 236 | 218 |
| 170 | 117 | 211 | 129 | 356 | 180 | 248 | 223 |
| 198 | 124 | 215 | 126 | 325 | 154 | 228 | 239 |
| 194 | 124 | 206 | 132 | 356 | 178 | 244 | 239 |
| 198 | 129 | 214 | 129 | 282 | 173 | 244 | 211 |
| 201 | 117 | 194 | 144 | 290 | 181 | 244 | 239 |
| 205 | 120 | 206 | 129 | 283 | 170 | 244 | 235 |
| 198 | 117 | 207 | 132 | 353 | 172 | 256 | 239 |
| 198 | 124 | 211 | 126 | 283 | 158 | 240 | 239 |
| 178 | 124 | 206 | 132 | 342 | 158 | 240 | 243 |
| 197 | 124 | 202 | 129 | 271 | 154 | 240 | 235 |
| 202 | 117 | 207 | 138 | 321 | 154 | 252 | 243 |
| 202 | 120 | 207 | 126 | 283 | 178 | 236 | 218 |
| 186 | 117 | 198 | 141 | 325 | 182 | 240 | 223 |

|     |     |     |     |     |     |     |     |
|-----|-----|-----|-----|-----|-----|-----|-----|
| 202 | 124 | 210 | 120 | 325 | 169 | 244 | 223 |
| 194 | 117 | 194 | 129 | 333 | 173 | 248 | 231 |
| 205 | 117 | 206 | 129 | 290 | 154 | 244 | 239 |
| 197 | 117 | 207 | 138 | 290 | 154 | 247 | 239 |
| 201 | 120 | 211 | 129 | 275 | 174 | 244 | 218 |
| 197 | 113 | 190 | 132 | 325 | 174 | 244 | 235 |
| 197 | 117 | 199 | 129 | 266 | 177 | 243 | 231 |
| 205 | 124 | 206 | 141 | 283 | 177 | 248 | 239 |
| 209 | 124 | 206 | 126 | 266 | 173 | 243 | 231 |
| 190 | 117 | 210 | 126 | 349 | 179 | 248 | 239 |
| 190 | 117 | 214 | 138 | 266 | 153 | 243 | 243 |
| 170 | 113 | 203 | 144 | 353 | 176 | 252 | 247 |
| 197 | 124 | 207 | 126 | 283 | 154 | 244 | 243 |
| 201 | 117 | 199 | 126 | 333 | 178 | 244 | 247 |
| 209 | 117 | 207 | 126 | 271 | 162 | 244 | 223 |
| 197 | 120 | 207 | 138 | 287 | 178 | 244 | 223 |
| 205 | 120 | 211 | 132 | 329 | 154 | 240 | 218 |
| 197 | 117 | 211 | 141 | 341 | 154 | 243 | 239 |
| 205 | 124 | 211 | 126 | 326 | 174 | 240 | 223 |
| 190 | 120 | 207 | 138 | 346 | 178 | 244 | 235 |
| 201 | 124 | 207 | 129 | 283 | 170 | 243 | 218 |
| 202 | 117 | 211 | 132 | 283 | 170 | 262 | 251 |
| 202 | 124 | 211 | 129 | 287 | 182 | 244 | 231 |
| 197 | 117 | 206 | 141 | 349 | 182 | 251 | 243 |
| 205 | 117 | 214 | 126 | 263 | 178 | 244 | 231 |
| 198 | 120 | 199 | 129 | 321 | 178 | 247 | 243 |
| 201 | 124 | 207 | 126 | 283 | 162 | 244 | 223 |
| 197 | 101 | 194 | 144 | 329 | 178 | 256 | 235 |
| 209 | 120 | 210 |     |     |     |     |     |
| 170 | 117 | 203 |     |     |     |     |     |
| 170 | 124 | 206 | 132 | 304 | 170 | 244 | 227 |
| 182 | 124 | 188 | 135 | 341 | 174 | 244 | 243 |
| 198 | 124 | 206 | 132 | 273 | 178 | 240 | 227 |

|     |     |     |     |     |     |     |     |
|-----|-----|-----|-----|-----|-----|-----|-----|
| 197 | 117 | 203 | 141 | 336 | 186 | 244 | 243 |
| 197 | 124 | 206 | 132 | 333 | 178 | 244 | 243 |
| 170 | 120 | 202 | 132 | 337 | 178 | 244 | 247 |
| 197 | 124 | 202 | 132 | 273 | 158 | 244 | 223 |
| 166 | 117 | 199 | 141 | 278 | 178 | 244 | 227 |
| 182 | 124 | 210 | 141 | 273 | 169 | 240 | 227 |
| 197 | 101 | 206 | 141 | 273 | 169 | 244 | 231 |
| 197 | 120 | 214 | 138 | 279 | 177 | 244 | 231 |
| 197 | 124 | 210 | 141 | 287 | 177 | 248 | 247 |
| 197 | 124 | 214 | 132 | 265 | 173 | 240 | 223 |
| 182 | 120 | 202 | 132 | 265 | 185 | 244 | 227 |
| 205 | 124 | 210 | 129 | 275 | 173 | 244 | 231 |
| 201 | 124 | 206 | 147 | 279 | 182 | 248 | 231 |
| 201 | 124 | 210 | 132 | 273 | 177 | 240 | 227 |
| 166 | 120 | 206 | 141 | 273 | 181 | 248 | 239 |
| 198 | 124 | 210 | 132 | 266 | 181 | 240 | 227 |
| 170 | 117 | 203 | 132 | 266 | 185 | 244 | 227 |
| 205 | 124 | 206 | 141 | 290 | 178 | 240 | 223 |
| 170 | 120 | 207 | 141 | 344 | 178 | 244 | 235 |
| 197 | 124 | 210 | 132 | 273 | 173 | 244 | 227 |
| 166 | 120 | 194 | 141 | 332 | 177 | 248 | 231 |
| 205 | 124 | 210 | 132 | 273 | 165 | 244 | 235 |
| 170 | 117 | 202 | 132 | 273 | 177 | 244 | 235 |
| 182 | 124 | 206 | 132 | 324 | 177 | 232 | 227 |
| 170 | 120 | 206 | 132 | 341 | 185 | 244 | 235 |
| 182 | 124 | 206 | 135 | 265 | 153 | 244 | 227 |
| 170 | 120 | 199 | 135 | 363 | 173 | 244 | 231 |
| 201 | 124 | 206 | 132 | 273 | 153 | 244 | 227 |
| 185 | 117 | 206 | 132 | 344 | 169 | 244 | 227 |
| 197 | 120 | 210 | 132 | 273 | 161 | 244 | 227 |
| 170 | 120 | 210 | 135 | 278 | 169 | 247 | 239 |
| 197 | 124 | 210 | 135 | 265 | 153 | 244 | 235 |
| 182 | 124 | 202 | 150 | 273 | 173 | 248 | 235 |

|     |     |     |     |     |     |     |     |
|-----|-----|-----|-----|-----|-----|-----|-----|
| 201 | 124 | 206 | 132 | 265 | 173 | 240 | 223 |
| 205 | 120 | 206 | 135 | 273 | 177 | 244 | 243 |
| 239 | 124 | 210 | 141 | 273 | 177 | 244 | 231 |
| 201 | 120 | 206 | 141 | 307 | 181 | 244 | 239 |
| 209 | 124 | 214 | 138 | 349 | 154 | 244 | 235 |
| 197 | 117 | 206 | 147 | 356 | 174 | 248 | 247 |
| 205 | 120 | 214 | 132 | 344 | 177 | 244 | 227 |
| 205 | 124 | 202 | 141 | 344 | 177 | 244 | 247 |
| 213 | 124 | 210 | 132 | 320 | 177 | 244 | 235 |
| 185 | 120 | 206 | 135 | 344 | 177 | 244 | 251 |
| 209 | 120 | 210 | 132 | 273 | 169 | 236 | 239 |
| 197 | 120 | 202 | 141 | 273 | 169 | 248 | 243 |
| 205 | 124 | 214 | 135 | 324 | 181 | 244 | 227 |
| 197 | 120 | 203 | 135 | 348 | 181 | 244 | 247 |
| 197 | 120 | 210 | 141 | 265 | 169 | 244 | 223 |
| 201 | 120 | 210 | 141 | 328 | 173 | 247 | 227 |
| 205 | 129 | 210 | 132 | 316 | 169 | 244 | 231 |
| 170 | 120 | 199 | 141 | 319 | 177 | 244 | 235 |
| 170 | 120 | 210 | 138 | 265 | 169 | 244 | 227 |
| 166 | 120 | 206 | 138 | 328 | 173 | 248 | 239 |
| 166 | 124 | 214 | 141 | 282 | 173 | 244 | 227 |
| 197 | 124 | 194 | 147 | 336 | 177 | 248 | 239 |
| 197 | 124 | 206 | 132 | 279 | 173 | 236 | 227 |
| 182 | 113 | 199 | 141 | 316 | 177 | 244 | 243 |
| 205 | 120 | 203 | 132 | 265 | 161 | 240 | 227 |
| 190 | 120 | 210 | 141 | 348 | 185 | 248 | 235 |
| 205 | 124 | 210 | 132 | 328 | 173 | 244 | 223 |
| 170 | 120 | 202 | 132 | 348 | 173 | 248 | 255 |
| 197 | 124 | 206 | 141 | 282 | 169 | 240 | 223 |
|     |     |     | 141 | 332 | 169 | 244 | 223 |
|     |     |     | 132 | 273 | 173 | 232 | 227 |
|     |     |     | 144 | 344 | 177 | 248 | 239 |

| <b>GATA63D12P</b> | <b>GATA88F09</b> | <b>GATA63F09</b> | <b>ATA25F04</b> |
|-------------------|------------------|------------------|-----------------|
| 185               | 286              | 243              | 243             |
| 193               | 290              | 247              | 243             |
| 193               | 290              | 247              | -9              |
| 197               | 294              | 247              | -9              |
| 185               | 290              | 247              | 249             |
| 189               | 294              | 251              | 249             |
| 189               | 290              | 243              | -9              |
| 193               | 294              | 251              | -9              |
| 181               | 294              | 247              | -9              |
| 197               | 299              | 247              | -9              |
| 181               | 290              | 243              | -9              |
| 199               | 294              | 251              | -9              |
| 189               | 290              | 246              | -9              |
| 193               | 294              | 246              | -9              |
| 185               | 286              | 243              | 243             |
| 193               | 290              | 251              | 243             |
| 181               | 290              | 243              | -9              |
| 189               | 294              | 251              | -9              |
| 174               | 294              | 247              | -9              |
| 185               | 294              | 247              | -9              |
| 185               | 286              | 247              | -9              |
| 193               | 294              | 247              | -9              |
| 189               | 294              | 243              | -9              |
| 197               | 298              | 251              | -9              |
| 185               | 286              | 247              | -9              |
| 185               | 290              | 247              | -9              |
| 193               | 286              | 243              | -9              |
| 197               | 290              | 247              | -9              |
| 181               | 278              | 239              | -9              |
| 185               | 294              | 247              | -9              |

|     |     |     |     |
|-----|-----|-----|-----|
| 193 | 290 | 247 | -9  |
| 199 | 294 | 255 | -9  |
| 166 | 282 | 247 | 246 |
| 166 | 286 | 247 | 246 |
| 174 | 290 | 243 | -9  |
| 189 | 294 | 247 | -9  |
| 170 | 290 | 243 | -9  |
| 181 | 294 | 247 | -9  |
| 170 | 270 | 243 | -9  |
| 199 | 290 | 251 | -9  |
| 185 | 286 | 247 | -9  |
| 189 | 294 | 251 | -9  |
| 174 | 290 | 247 | -9  |
| 174 | 290 | 251 | -9  |
| 185 | 294 | 250 | 243 |
| 185 | 294 | 254 | 243 |
| 193 | 286 | 243 | -9  |
| 203 | 298 | 247 | -9  |
| 189 | 286 | 251 | -9  |
| 189 | 294 | 251 | -9  |
| 185 | 290 | 239 | -9  |
| 203 | 294 | 243 | -9  |
| 174 | 290 | 247 | 228 |
| 187 | 290 | 247 | 228 |
| 145 | 285 | 247 | -9  |
| 178 | 290 | 251 | -9  |
| 168 | 285 | 247 | -9  |
| 174 | 290 | 263 | -9  |
| 170 | 298 | 255 | -9  |
| 174 | 302 | 259 | -9  |
| 166 | 274 | 239 | -9  |
| 166 | 298 | 251 | -9  |



|     |     |     |     |
|-----|-----|-----|-----|
| 174 | 285 | 247 | 246 |
| 178 | 290 | 251 | 246 |
| 174 | 270 | 239 | -9  |
| 174 | 299 | 242 | -9  |
| 150 | 266 | 239 | -9  |
| 174 | 294 | 251 | -9  |
| 166 | 270 | 247 | 243 |
| 174 | 294 | 251 | 243 |
| 178 | 297 | 247 | 243 |
| 182 | 297 | 247 | 243 |
| 178 | 281 | 251 | -9  |
| 182 | 294 | 251 | -9  |
| 170 | 290 | 247 | -9  |
| 174 | 290 | 247 | -9  |
| 170 | 286 | 247 | -9  |
| 178 | 297 | 251 | -9  |
| 170 | 270 | 243 | -9  |
| 178 | 270 | 243 | -9  |
| 174 | 274 | 247 | -9  |
| 178 | 274 | 251 | -9  |
| 170 | 270 | 247 | -9  |
| 178 | 270 | 247 | -9  |
| 174 | 282 | 243 | -9  |
| 174 | 286 | 243 | -9  |
| 174 | 270 | 251 | -9  |
| 174 | 270 | 251 | -9  |
| 145 | 294 | 243 | -9  |
| 178 | 294 | 243 | -9  |
| 174 | 302 | 247 | -9  |
| 174 | 302 | 247 | -9  |
| 170 | 281 | 243 | -9  |
| 174 | 281 | 243 | -9  |
| 170 | 290 | 243 | -9  |

|     |     |     |     |
|-----|-----|-----|-----|
| 170 | 294 | 243 | -9  |
| 166 | 290 | 251 | -9  |
| 187 | 302 | 251 | -9  |
| 166 | 266 | 247 | -9  |
| 182 | 294 | 251 | -9  |
| 174 | 290 | 243 | -9  |
| 174 | 294 | 247 | -9  |
| 174 | 274 | 247 | -9  |
| 187 | 302 | 255 | -9  |
| 170 | 281 | 247 | 228 |
| 178 | 290 | 247 | 228 |
| 174 | 285 | 243 | -9  |
| 178 | 285 | 247 | -9  |
| 170 | 270 | 239 | -9  |
| 174 | 290 | 247 | -9  |
| 172 | 278 | 247 | -9  |
| 174 | 286 | 247 | -9  |
| 168 | 274 | 247 | -9  |
| 174 | 274 | 251 | -9  |
| 145 | 294 | 251 | -9  |
| 178 | 294 | 251 | -9  |
| 174 | 286 | 247 | -9  |
| 182 | 294 | 263 | -9  |
| 174 | 274 | 251 | -9  |
| 174 | 302 | 251 | -9  |
| 145 | 274 | 243 | -9  |
| 178 | 300 | 247 | -9  |
| 174 | 290 | 235 | -9  |
| 174 | 294 | 235 | -9  |
| 170 | 282 | 247 | -9  |
| 174 | 298 | 261 | -9  |
| 178 | 294 | 247 | -9  |
| 182 | 299 | 251 | -9  |

|     |     |     |     |
|-----|-----|-----|-----|
| 166 | 274 | 247 | -9  |
| 174 | 290 | 251 | -9  |
| 174 | 278 | 247 | -9  |
| 178 | 286 | 251 | -9  |
| 145 | 282 | 235 | -9  |
| 174 | 294 | 247 | -9  |
| 174 | 274 | 235 | 249 |
| 182 | 294 | 251 | 249 |
| 166 | 286 | 259 | 258 |
| 174 | 318 | 259 | 258 |
| 174 | 286 | 227 | -9  |
| 174 | 302 | 247 | -9  |
| 174 | 281 | 235 | 228 |
| 191 | 302 | 255 | 228 |
| 174 | 290 | 246 | -9  |
| 178 | 298 | 251 | -9  |
| 172 | 290 | 247 | -9  |
| 174 | 290 | 247 | -9  |
| 166 | 290 | 243 | -9  |
| 174 | 302 | 255 | -9  |
| 170 | 281 | 247 | -9  |
| 174 | 294 | 247 | -9  |
| 178 | 282 | 223 | 243 |
| 178 | 285 | 223 | 243 |
| 174 | 282 | 247 | 246 |
| 174 | 290 | 251 | 246 |
| 170 | 281 | 243 | -9  |
| 174 | 285 | 243 | -9  |
| 174 | 270 | 247 | 249 |
| 182 | 309 | 247 | 249 |
| 158 | 270 | 251 | 249 |

|     |     |     |     |
|-----|-----|-----|-----|
| 170 | 313 | 251 | 249 |
| 174 | 309 | 243 | -9  |
| 182 | 313 | 243 | -9  |
| 178 | 270 | 247 | -9  |
| 182 | 290 | 247 | -9  |
| 170 | 286 | 243 | 249 |
| 174 | 313 | 243 | 249 |
| 182 | 270 | 239 | 249 |
| 182 | 274 | 247 | 249 |
| 170 | 262 | 243 | -9  |
| 174 | 270 | 243 | -9  |
| 174 | 278 | 243 | -9  |
| 182 | 309 | 255 | -9  |
| 145 | 270 | 247 | 243 |
| 170 | 298 | 247 | 243 |
| 145 | 270 | 243 | -9  |
| 174 | 294 | 243 | -9  |
| 174 | 290 | -9  | -9  |
| 178 | 318 | -9  | -9  |
| 145 | 270 | 243 | 249 |
| 174 | 313 | 243 | 249 |
| 170 | 309 | 243 | -9  |
| 182 | 313 | 247 | -9  |
| 145 | 262 | 247 | 249 |
| 145 | 294 | 247 | 249 |
| 170 | 274 | 247 | 249 |
| 174 | 313 | 247 | 249 |
| 174 | 270 | 247 | -9  |
| 187 | 274 | 247 | -9  |
| 170 | 266 | 250 | 249 |
| 187 | 313 | 250 | 249 |
| 178 | 313 | 251 | 249 |
| 178 | 313 | 251 | 249 |

|     |     |     |     |
|-----|-----|-----|-----|
| 170 | 300 | 247 | 249 |
| 187 | 313 | 251 | 249 |
| 145 | 297 | 251 | -9  |
| 170 | 297 | 255 | -9  |
| 174 | 270 | 247 | 249 |
| 178 | 270 | 247 | 249 |
| 145 | 270 | 247 | -9  |
| 174 | 270 | 251 | -9  |
| 170 | 274 | 247 | -9  |
| 191 | 309 | 255 | -9  |
| 174 | 309 | 247 | -9  |
| 182 | 313 | 255 | -9  |
| 174 | 262 | 247 | -9  |
| 178 | 270 | 247 | -9  |
| 170 | 313 | 255 | 249 |
| 174 | 318 | 255 | 249 |
| 174 | 270 | 247 | 240 |
| 178 | 270 | 247 | 240 |
| 174 | 274 | 247 | 249 |
| 182 | 318 | 251 | 249 |
| 145 | 274 | 251 | -9  |
| 145 | 313 | 251 | -9  |
| 170 | 274 | 243 | 249 |
| 170 | 298 | 243 | 249 |
| 168 | 270 | 263 | 249 |
| 178 | 313 | 263 | 249 |
| 174 | 270 | 247 | 261 |
| 174 | 290 | 247 | 261 |
| 174 | 278 | -9  | 252 |
| 182 | 294 | -9  | 252 |
| 145 | 274 | 247 | -9  |
| 178 | 274 | 247 | -9  |

**Table S5** Microsatellite genotypes of 128 chimpanzees from European Zoos.

| <b>Sample ID</b> | <b>GATA104</b> | <b>GATA129H04</b> | <b>GATA176C01</b> | <b>GATA71H05</b> | <b>ATA27A06P</b> | <b>GATA43A04</b> | <b>GATA14E09</b> |
|------------------|----------------|-------------------|-------------------|------------------|------------------|------------------|------------------|
| 10667_Blacky     | 182            | 224               | 219               | 273              | 111              | 128              | 181              |
|                  | 182            | 228               | 219               | 273              | 120              | 136              | 181              |
| 10742_Marina     | 200            | 231               | 247               | 246              | 120              | 132              | 197              |
|                  | 207            | 239               | 251               | 273              | 133              | 167              | 204              |
| 10784_Jimmie     | 186            | 202               | 215               | 269              | 120              | 124              | 181              |
|                  | 194            | 221               | 219               | 269              | 136              | 136              | 189              |
| 10964_Cindy      | 145            | 216               | -9                | 238              | 123              | 156              | 181              |
|                  | 174            | 247               | -9                | 275              | 136              | 156              | 193              |
| 10975_Og         | 182            | 221               | 226               | 269              | 120              | 132              | 189              |
|                  | 182            | 224               | 254               | 269              | 136              | 132              | 193              |
| 11046_Fips       | 205            | 214               | 235               | 266              | 136              | 140              | 185              |
|                  | 205            | 217               | 255               | 266              | 136              | 140              | 197              |
| 11134_Joey       | 181            | 198               | 215               | 261              | 120              | 128              | 189              |
|                  | 181            | 221               | 219               | 269              | 139              | 136              | 193              |
| 11193_Pippi      | 177            | 221               | 219               | 261              | 120              | 132              | 193              |
|                  | 181            | 224               | 222               | 269              | 139              | 132              | 193              |
| 11205_Lady       | 182            | 217               | 215               | 269              | 126              | 132              | 181              |
|                  | 182            | 232               | 219               | 269              | 136              | 132              | 193              |
| 11284_Choppers   | 178            | 224               | 200               | 261              | 120              | 132              | 181              |
|                  | 186            | 232               | 219               | 261              | 120              | 136              | 181              |
| 11309_Kate       | 181            | 221               | 215               | 265              | 120              | 136              | 181              |
|                  | 185            | 224               | 219               | 265              | 120              | 140              | 193              |
| 11352_Mirinda    | 192            | 231               | 243               | 238              | 120              | 128              | 181              |
|                  | 199            | 239               | 254               | 250              | 123              | 138              | 200              |
| 11371_Judy       | 205            | 217               | 243               | 266              | 120              | 136              | 181              |
|                  | 211            | 228               | 245               | 266              | 120              | 140              | 181              |
| 11376_Noddy      | 182            | 221               | 200               | 261              | 120              | 128              | 185              |
|                  | 186            | 224               | 215               | 293              | 120              | 132              | 193              |
| 11378_Sam        | 197            | 218               | 235               | 254              | 120              | 132              | 185              |
|                  | 208            | 218               | 249               | 262              | 120              | 145              | 193              |

|               |     |     |     |     |     |     |     |
|---------------|-----|-----|-----|-----|-----|-----|-----|
| 11387_Heidi   | 182 | 202 | 211 | 261 | 126 | 128 | 185 |
|               | 186 | 213 | 215 | 261 | 139 | 136 | 193 |
| 11421_Luisa   | 202 | 235 | 207 | 266 | 117 | 143 | 181 |
|               | 208 | 240 | 251 | 270 | 133 | 148 | 189 |
| 11431_Malin   | 181 | 213 | 215 | 269 | 120 | 128 | 189 |
|               | 199 | 231 | 251 | 273 | 120 | 167 | 197 |
| 11492_Max     | 205 | 206 | 245 | 238 | 120 | 134 | 192 |
|               | 205 | 247 | 259 | 242 | 120 | 134 | 208 |
| 11539_David   | 170 | 214 | -9  | 262 | 117 | 128 | 193 |
|               | 194 | 235 | -9  | 262 | 129 | 132 | 197 |
| 11594_Nicky   | 182 | 220 | 200 | 238 | 117 | 132 | 181 |
|               | 200 | 228 | 251 | 255 | 117 | 136 | 200 |
| 11614_Kip     | 182 | 224 | 200 | 261 | 136 | 128 | 181 |
|               | 182 | 231 | 238 | 266 | 136 | 167 | 197 |
| 11639_Tojo    | 196 | 217 | 243 | 258 | 133 | 136 | 193 |
|               | 196 | 221 | 247 | 281 | 133 | 167 | 193 |
| 11650_Lucy    | 170 | 214 | -9  | 250 | 117 | 128 | 181 |
|               | 189 | 221 | -9  | 261 | 126 | 136 | 197 |
| 11664_Judy    | 205 | 214 | 239 | 262 | 129 | 132 | 189 |
|               | 211 | 239 | 243 | 266 | 136 | 182 | 193 |
| 11669_Putzi   | 199 | 235 | 245 | 258 | 123 | 136 | 185 |
|               | 199 | 247 | 245 | 286 | 133 | 140 | 189 |
| 11688_Moniek  | 178 | 221 | 211 | 273 | 126 | 124 | 181 |
|               | 198 | 228 | 211 | 273 | 133 | 132 | 181 |
| 11696_Toto_I  | 182 | 202 | 243 | 238 | 126 | 128 | 189 |
|               | 202 | 243 | 255 | 273 | 126 | 136 | 197 |
| 11724_Shirley | 200 | 231 | 239 | 254 | 133 | 132 | 189 |
|               | 205 | 243 | 245 | 254 | 133 | 140 | 189 |
| 11749_Santino | 181 | 224 | 219 | 261 | 114 | 132 | 181 |
|               | 181 | 248 | 254 | 261 | 120 | 167 | 193 |
| 11799_Roosje  | 182 | 209 | 215 | 269 | 120 | 132 | 185 |
|               | 182 | 224 | 219 | 269 | 133 | 136 | 189 |
| 11802_Andy    | 185 | 212 | 219 | 250 | 136 | 132 | 181 |

|                    |     |     |     |     |     |     |     |
|--------------------|-----|-----|-----|-----|-----|-----|-----|
|                    | 199 | 232 | 255 | 250 | 139 | 167 | 193 |
| 11932_Emma         | 174 | 231 | -9  | 238 | 117 | 136 | 181 |
|                    | 183 | 231 | -9  | 266 | 133 | 145 | 197 |
| 11939_Brigitte     | 212 | 202 | 259 | 258 | 120 | 128 | 189 |
|                    | 212 | 210 | 259 | 270 | 129 | 132 | 189 |
| 11949_Bini         | 177 | 221 | 219 | 261 | 120 | 132 | 181 |
|                    | 177 | 224 | 223 | 261 | 120 | 136 | 193 |
| 11969_Kiki         | 182 | 217 | 219 | 261 | 120 | 124 | 181 |
|                    | 186 | 221 | 219 | 261 | 126 | 136 | 197 |
| 12044_Fali         | 182 | 224 | 219 | 261 | 120 | 124 | 181 |
|                    | 182 | 228 | 219 | 269 | 139 | 124 | 189 |
| 12052_NillaNicklas | 182 | 217 | 215 | 261 | 120 | 128 | 181 |
|                    | 186 | 221 | 222 | 261 | 136 | 136 | 189 |
| 12060_Lyndsey      | 145 | 235 | -9  | 262 | 117 | 132 | 181 |
|                    | 170 | 247 | -9  | 275 | 136 | 156 | 197 |
| 12063_Arnold       | 208 | 231 | 251 | 258 | 120 | 136 | 189 |
|                    | 208 | 239 | 255 | 261 | 123 | 136 | 193 |
| 12080_Gaby         | 182 | 221 | 215 | 261 | 120 | 124 | 185 |
|                    | 182 | 221 | 219 | 269 | 120 | 140 | 193 |
| 12089_Chiquita     | 186 | 224 | 219 | 261 | 133 | 132 | 189 |
|                    | 197 | 239 | 243 | 261 | 136 | 167 | 193 |
| 12130_Menolly      | 182 | 224 | 215 | 261 | 120 | 136 | 181 |
|                    | 185 | 228 | 219 | 261 | 126 | 136 | 189 |
| 12168_Usaka        | 192 | 228 | 255 | 258 | 120 | 132 | 197 |
|                    | 208 | 239 | 259 | 266 | 120 | 180 | 197 |
| 12170_Maaike       | 207 | 225 | 251 | 254 | 120 | 132 | 189 |
|                    | 220 | 243 | 255 | 261 | 123 | 136 | 193 |
| 12194_Utomde       | 194 | 239 | 235 | 242 | 120 | 136 | 200 |
|                    | 205 | 243 | 251 | 258 | 120 | 145 | 208 |
| 12209_Pippin       | 182 | 206 | 199 | 269 | 126 | 128 | 181 |
|                    | 182 | 221 | 219 | 269 | 136 | 140 | 193 |
| 12256_Linda        | 192 | 221 | 215 | 234 | 123 | 161 | 193 |
|                    | 197 | 239 | 259 | 238 | 129 | 161 | 204 |



|               |     |     |     |     |     |     |     |
|---------------|-----|-----|-----|-----|-----|-----|-----|
| 12271_Chispi  | 200 | 235 | 251 | 250 | 120 | 132 | 181 |
|               | 224 | 239 | 254 | 273 | 126 | 140 | 197 |
| 12283_Maria   | 200 | 214 | 211 | 262 | 120 | 124 | 193 |
|               | 200 | 239 | 219 | 262 | 123 | 136 | 201 |
| 12299_Miff    | 178 | 224 | 200 | 238 | 120 | 132 | 181 |
|               | 203 | 228 | 219 | 261 | 129 | 136 | 193 |
| 12311_Ula     | 211 | 221 | 215 | 258 | 120 | 161 | 181 |
|               | 211 | 247 | 243 | 266 | 120 | 200 | 181 |
| 12314_Cindy   | 182 | 202 | 215 | 261 | 120 | 128 | 181 |
|               | 186 | 206 | 223 | 261 | 120 | 132 | 193 |
| 12320_Lara    | 196 | 214 | 219 | 258 | 120 | 142 | 181 |
|               | 208 | 239 | 243 | 262 | 117 | 142 | 204 |
| 12323_Lily    | 207 | 239 | 219 | 238 | 123 | 166 | 193 |
|               | 207 | 247 | 219 | 238 | 123 | 166 | 208 |
| 12328_Chita   | 205 | 224 | 243 | 246 | 123 | 167 | 197 |
|               | 205 | 252 | 255 | 246 | 123 | 167 | 197 |
| 12341_Moreno  | 178 | 221 | 223 | 261 | 136 | 136 | 181 |
|               | 182 | 224 | 251 | 261 | 139 | 136 | 193 |
| 12348_Luky    | 200 | 239 | 215 | 269 | 123 | 136 | 181 |
|               | 208 | 245 | 254 | 269 | 133 | 161 | 200 |
| 12361_Sally   | 182 | 221 | 215 | 261 | 120 | 124 | 193 |
|               | 182 | 228 | 219 | 265 | 120 | 136 | 193 |
| 12388_Copper  | 182 | 198 | 215 | 261 | 120 | 128 | 181 |
|               | 182 | 228 | 219 | 261 | 139 | 132 | 189 |
| 12396_Tatu    | 182 | 206 | 215 | 261 | 126 | 124 | 181 |
|               | 182 | 224 | 219 | 261 | 139 | 132 | 193 |
| 12419_Shirli  | 182 | 209 | 215 | -9  | -9  | 128 | 181 |
|               | 182 | 209 | 219 | -9  | -9  | 132 | 197 |
| 12454_Jonatan | 182 | 206 | 215 | 261 | 133 | 128 | 181 |
|               | 182 | 217 | 223 | 261 | 139 | 132 | 197 |
| 12455_Jamie   | 182 | 202 | 219 | 238 | 126 | 140 | 181 |
|               | 199 | 212 | 255 | 238 | 139 | 167 | 189 |
| 12472_Malin   | 185 | 201 | 219 | 265 | 120 | 128 | 181 |

|                 |     |     |     |     |     |     |     |
|-----------------|-----|-----|-----|-----|-----|-----|-----|
|                 | 185 | 224 | 222 | 269 | 126 | 132 | 193 |
| 12559_Siri      | 216 | 231 | 196 | 246 | 120 | 136 | 193 |
|                 | 220 | 247 | 255 | 261 | 133 | 136 | 197 |
| 12600_Qafzeh    | 174 | 216 | -9  | 238 | 117 | 145 | 181 |
|                 | 178 | 231 | -9  | 275 | 117 | 145 | 193 |
| 12609_Quatro    | 167 | 217 | 215 | 261 | 120 | 128 | 181 |
|                 | 185 | 224 | 219 | 269 | 136 | 132 | 193 |
| 12632_Tzippi    | 186 | 224 | 245 | 261 | 120 | 167 | 185 |
|                 | 205 | 235 | 247 | 261 | 136 | 167 | 189 |
| 12647_Tambuzi   | 202 | 243 | 251 | 261 | 123 | 136 | 181 |
|                 | 208 | 247 | 251 | 270 | 126 | 136 | 193 |
| 12655_Negrita   | 194 | 228 | 243 | 266 | 120 | 139 | 193 |
|                 | 200 | 239 | 243 | 266 | 123 | 139 | 193 |
| 12660_Obe       | 185 | 239 | 238 | 238 | 120 | 131 | 189 |
|                 | 205 | 243 | 247 | 266 | 123 | 131 | 201 |
| 12665_Tupelo    | 178 | 198 | 219 | 277 | 120 | 124 | 181 |
|                 | 205 | 202 | 243 | 277 | 120 | 140 | 189 |
| 12667_Limbo     | 181 | 213 | 215 | 265 | 136 | 132 | 193 |
|                 | 181 | 224 | 222 | 265 | 139 | 132 | 197 |
| 12678_Kilimi    | 194 | 210 | -9  | 262 | 129 | 128 | 193 |
|                 | 194 | 214 | -9  | 275 | 136 | 132 | 197 |
| 12725_Geisha    | 178 | 214 | 211 | 269 | 126 | 128 | 185 |
|                 | 200 | 221 | 219 | 273 | 126 | 140 | 189 |
| 12730_Tsavo     | 178 | 228 | 200 | 238 | 117 | 136 | 189 |
|                 | 178 | 243 | 219 | 261 | 120 | 149 | 193 |
| 12737_Christmas | 197 | 202 | 219 | 238 | 117 | 132 | 181 |
|                 | 197 | 231 | 219 | 261 | 120 | 132 | 193 |
| 12773_Gost      | 208 | 239 | 215 | 258 | 120 | 136 | 197 |
|                 | 208 | 239 | 255 | 270 | 123 | 136 | 200 |
| 12775_Isabelle  | 182 | 221 | 200 | 238 | 120 | 132 | 181 |
|                 | 182 | 243 | 219 | 261 | 120 | 149 | 181 |
| 12776_Benji     | 196 | 231 | 219 | 238 | 117 | 149 | 189 |
|                 | 196 | 239 | 222 | 261 | 133 | 149 | 193 |

|                 |     |     |     |     |     |     |     |
|-----------------|-----|-----|-----|-----|-----|-----|-----|
| 12802_Vakanga   | 182 | 224 | 215 | 269 | 120 | 124 | 181 |
|                 | 182 | 228 | 219 | 273 | 136 | 132 | 185 |
| 12809_Lizzy     | 182 | 224 | 215 | 261 | 120 | 124 | 181 |
|                 | 182 | 228 | 219 | 261 | 120 | 124 | 193 |
| 12870_Chriessie | 182 | 198 | 215 | 261 | 120 | 124 | 181 |
|                 | 182 | 224 | 223 | 269 | 139 | 136 | 189 |
| 12897_Balima    | 182 | 217 | 226 | 269 | 120 | 132 | 181 |
|                 | 182 | 217 | 226 | 277 | 136 | 136 | 185 |
| 12917_Napoleon  | 182 | 206 | 219 | 261 | 126 | 128 | 181 |
|                 | 186 | 217 | 223 | 273 | 136 | 136 | 189 |
| 12920_Marios    | 192 | 213 | 215 | 261 | 120 | 132 | 189 |
|                 | 199 | 224 | 219 | 273 | 139 | 167 | 193 |
| 12922_Kindia    | 145 | 235 | -9  | 262 | 129 | 132 | 181 |
|                 | 197 | 247 | -9  | 275 | 136 | 156 | 197 |
| 12931_Meli      | 192 | 217 | 219 | 261 | 123 | 132 | 181 |
|                 | 192 | 228 | 251 | 270 | 136 | 136 | 197 |
| 12946_Patti     | 182 | 224 | 215 | 261 | 120 | 124 | 181 |
|                 | 186 | 224 | 223 | 265 | 120 | 136 | 181 |
| 12949_Gudu      | 192 | 239 | 215 | 266 | 123 | 132 | 181 |
|                 | 208 | 243 | 259 | 270 | 136 | 161 | 197 |
| 12976_Zarno     | 192 | 198 | 211 | 262 | 129 | 136 | 189 |
|                 | 196 | 202 | 255 | 269 | 136 | 149 | 193 |
| 13016_Liberius  | 174 | 214 | -9  | 242 | 123 | 128 | 193 |
|                 | 189 | 216 | -9  | 261 | 126 | 140 | 197 |
| 13025_Elisha    | 194 | 224 | 200 | 258 | 120 | 136 | 181 |
|                 | 202 | 228 | 219 | 258 | 123 | 136 | 200 |
| 13090_Knerten   | 182 | 224 | 200 | 261 | 129 | 128 | 181 |
|                 | 203 | 228 | 247 | 261 | 139 | 136 | 193 |
| 13098_Fanny     | 186 | 202 | 215 | 261 | 120 | 124 | 181 |
|                 | 186 | 202 | 255 | 273 | 136 | 124 | 189 |
| 13100_Guis      | 208 | 202 | 235 | 258 | 120 | 136 | 197 |
|                 | 208 | 228 | 255 | 266 | 120 | 136 | 208 |
| 13119_Cesare    | 182 | 221 | 215 | 254 | 120 | 136 | 181 |

|                   |     |     |     |     |     |     |     |
|-------------------|-----|-----|-----|-----|-----|-----|-----|
|                   | 182 | 224 | 223 | 267 | 136 | 136 | 193 |
| 13163_Giorgia     | 205 | 221 | 219 | 266 | 114 | 136 | 181 |
|                   | 208 | 241 | 251 | 266 | 117 | 149 | 216 |
| 13173_Tisa        | 182 | 217 | 215 | 261 | 136 | 132 | 181 |
|                   | 182 | 232 | 215 | 269 | 136 | 132 | 181 |
| 13185_Simliki     | 182 | 217 | 215 | 261 | 120 | 132 | 181 |
|                   | 202 | 221 | 219 | 261 | 126 | 136 | 185 |
| 13205             | 181 | 231 | 200 | 238 | 117 | 132 | 181 |
|                   | 181 | 231 | 251 | 238 | 120 | 149 | 189 |
| 13214_Tjobbe      | 178 | 221 | 215 | 261 | 120 | 128 | 181 |
|                   | 178 | 221 | 219 | 273 | 126 | 128 | 181 |
| 13217_Kume        | 182 | 224 | 200 | 261 | 120 | 124 | 181 |
|                   | 182 | 228 | 219 | 261 | 139 | 140 | 197 |
| 13231_Kisha       | 182 | 224 | 215 | 269 | 120 | 132 | 181 |
|                   | 182 | 228 | 219 | 269 | 136 | 132 | 185 |
| 13270_Nera_Eme    | 194 | 231 | 243 | 238 | 123 | 128 | 197 |
|                   | 220 | 239 | 255 | 270 | 123 | 145 | 200 |
| 13640_12263_Daza  | 182 | 221 | 215 | 265 | 120 | 132 | 189 |
|                   | 186 | 224 | 219 | 273 | 123 | 140 | 189 |
| 13649_12264_Jeudi | 200 | 235 | 251 | 246 | 133 | 136 | 189 |
|                   | 220 | 239 | 255 | 261 | 133 | 140 | 193 |
| 13654_Antoine     | 190 | 224 | 200 | 261 | 120 | 132 | 181 |
|                   | 198 | 224 | 223 | 273 | 136 | 136 | 181 |
| 13656_Brigitta    | -9  | 202 | 211 | 266 | 117 | 136 | 181 |
|                   | -9  | 252 | 238 | 269 | 126 | 136 | 204 |
| 13658_Guidage     | 182 | 221 | 215 | 261 | 120 | 128 | 181 |
|                   | 186 | 224 | 215 | 269 | 136 | 132 | 185 |
| 13692_Toto        | 200 | 210 | 243 | 258 | 126 | 140 | 185 |
|                   | 200 | 243 | 247 | 282 | 129 | 167 | 189 |
| 13693_Maggy       | 192 | 217 | 219 | 238 | 136 | 143 | 181 |
|                   | 203 | 224 | 219 | 258 | 136 | 143 | 181 |
| 13694_Sony        | 182 | 224 | 215 | 261 | 120 | 128 | 193 |
|                   | 202 | 228 | 230 | 265 | 136 | 136 | 197 |

|                 |     |     |     |     |     |     |     |
|-----------------|-----|-----|-----|-----|-----|-----|-----|
| 13701_Kymbo     | 182 | 206 | 223 | 250 | 123 | 128 | 189 |
|                 | 194 | 239 | 243 | 261 | 136 | 138 | 200 |
| 13724_Oseye     | -9  | 202 | 200 | 261 | 117 | 136 | -9  |
|                 | -9  | 220 | 255 | 273 | 117 | 136 | -9  |
| 13725_Pili      | 200 | 210 | 226 | 258 | 117 | 132 | 181 |
|                 | 200 | 220 | 259 | 261 | 129 | 136 | 189 |
| 13726_Petiri    | 182 | 210 | 226 | 270 | 129 | 132 | 181 |
|                 | 182 | 217 | 259 | 270 | 136 | 132 | 189 |
| 13736_Frederike | 197 | 210 | 239 | 246 | 123 | 136 | 193 |
|                 | 197 | 243 | 255 | 266 | 126 | 167 | 193 |
| 13753_Pembele   | -9  | 220 | 226 | 261 | 136 | 167 | 181 |
|                 | -9  | 235 | 243 | 266 | 136 | 167 | 181 |
| 11727_Adam      | 181 | 206 | 215 | 238 | 120 | 128 | 181 |
|                 | 205 | 224 | 251 | 269 | 123 | 140 | 197 |
| Bimbo_750       | 196 | 206 | 247 | 262 | 126 | 124 | 181 |
|                 | 207 | 217 | 251 | 266 | 136 | 145 | 185 |
| Bobby_795       | 199 | 206 | 235 | 250 | 117 | 136 | 189 |
|                 | 205 | 235 | 247 | 254 | 120 | 167 | 193 |
| Frits_690       | 202 | 224 | 196 | 258 | 117 | 132 | 181 |
|                 | 202 | 236 | 200 | 258 | 139 | 136 | 200 |
| Max(1)_444      | 205 | 214 | 207 | 242 | 129 | 136 | 189 |
|                 | 216 | 247 | 251 | 274 | 129 | 140 | 197 |
| 12914_Max(2)    | 200 | 182 | 211 | 273 | 117 | 132 | 189 |
|                 | 200 | 235 | 245 | 286 | 133 | 140 | 193 |
| Susi_W          | 205 | 210 | 238 | 238 | 120 | 132 | 181 |
|                 | 205 | 243 | 255 | 269 | 123 | 161 | 200 |
| Tommy_441       | 182 | 239 | 247 | 238 | 120 | 161 | 181 |
|                 | 182 | 243 | 255 | 269 | 133 | 167 | 193 |

| <b>GATA116B01N</b> | <b>GATA50G06</b> | <b>UT7544</b> | <b>GGAA21G11L</b> | <b>GATA28F03</b> | <b>TCTA017M</b> | <b>AGAT120</b> | <b>GATA25A04</b> |
|--------------------|------------------|---------------|-------------------|------------------|-----------------|----------------|------------------|
| 149                | 210              | 155           | 158               | 247              | 174             | 265            | 198              |
| 161                | 214              | 157           | 170               | 255              | 193             | 286            | 198              |
| 149                | 210              | 161           | 137               | 244              | 181             | 278            | 197              |
| 154                | 210              | 161           | 166               | 248              | 185             | 278            | 201              |
| 161                | 206              | 155           | 158               | 251              | 185             | 265            | 190              |
| 184                | 210              | 157           | 162               | 251              | 189             | 270            | 201              |
| 145                | 218              | 165           | 170               | 255              | 181             | 265            | 198              |
| 184                | 226              | 169           | 174               | 255              | 212             | 274            | 201              |
| 184                | 210              | 155           | 170               | 247              | 189             | 253            | 189              |
| 184                | 214              | 155           | 178               | 247              | 193             | 278            | 202              |
| 165                | 230              | 153           | 162               | 252              | 185             | 274            | 197              |
| 181                | 234              | 161           | 166               | 252              | 252             | 282            | 197              |
| 145                | 202              | 155           | 162               | 247              | 178             | 262            | 189              |
| 192                | 214              | 169           | 170               | 247              | 189             | 278            | 194              |
| 184                | 210              | 161           | 166               | 247              | 178             | 258            | 198              |
| 184                | 214              | 169           | 170               | 255              | 189             | 265            | 198              |
| 145                | 202              | 155           | 166               | 247              | 178             | 265            | 194              |
| 184                | 214              | 161           | 178               | 255              | 189             | 278            | 194              |
| 161                | 198              | 155           | 170               | 251              | 189             | 265            | 194              |
| 188                | 214              | 155           | 170               | 251              | 189             | 274            | 198              |
| 180                | 202              | 155           | 170               | 247              | 189             | 249            | 194              |
| 184                | 214              | 155           | 182               | 247              | 189             | 282            | 202              |
| 173                | 202              | 161           | 158               | 260              | 193             | 282            | 189              |
| 203                | 226              | 169           | 162               | 267              | 197             | 286            | 205              |
| 154                | 230              | 157           | 158               | 244              | 182             | 265            | 197              |
| 158                | 234              | 169           | 166               | 251              | 200             | 278            | 201              |
| 145                | 206              | 155           | 170               | 247              | 186             | 253            | 198              |
| 161                | 210              | 161           | 178               | 255              | 189             | 278            | 202              |
| 177                | 218              | 153           | 158               | 248              | 177             | 262            | 182              |
| 181                | 234              | 158           | 162               | 255              | 193             | 262            | 205              |

|     |     |     |     |     |     |     |     |
|-----|-----|-----|-----|-----|-----|-----|-----|
| 149 | 206 | 155 | 162 | 247 | 162 | 262 | 194 |
| 161 | 214 | 165 | 174 | 251 | 193 | 265 | 194 |
| 154 | 210 | 158 | 158 | 247 | 181 | 270 | 189 |
| 158 | 210 | 165 | 158 | 247 | 185 | 274 | 197 |
| 154 | 206 | 161 | 137 | 247 | 185 | 278 | 194 |
| 161 | 210 | 165 | 162 | 255 | 189 | 282 | 197 |
| 149 | 218 | 153 | 150 | 259 | 178 | 262 | 205 |
| 157 | 230 | 165 | 158 | 263 | 189 | 274 | 205 |
| 177 | 214 | 154 | 170 | 247 | 186 | 278 | 194 |
| 184 | 218 | 176 | 174 | 255 | 189 | 282 | 197 |
| 154 | 206 | 157 | 150 | 256 | 197 | 262 | 194 |
| 161 | 214 | 157 | 166 | 256 | 197 | 289 | 198 |
| 161 | 202 | 155 | 158 | 247 | 185 | 265 | 181 |
| 184 | 226 | 172 | 178 | 259 | 193 | 270 | 186 |
| 149 | 218 | 161 | 145 | 251 | 189 | 270 | 170 |
| 154 | 222 | 161 | 162 | 251 | 189 | 270 | 201 |
| 184 | 190 | 153 | 158 | 255 | 189 | 270 | 189 |
| 184 | 214 | 155 | 170 | 263 | 189 | 285 | 194 |
| 145 | 222 | 161 | 158 | 248 | 181 | 274 | 182 |
| 144 | 242 | 165 | 158 | 256 | 193 | 274 | 205 |
| 154 | 230 | 169 | 150 | -9  | 193 | 265 | 170 |
| 158 | 238 | 169 | 150 | -9  | 193 | 270 | 197 |
| 158 | 210 | 165 | 166 | 251 | 185 | 265 | 198 |
| 161 | 238 | 169 | 170 | 251 | 193 | 278 | 209 |
| 158 | 210 | 158 | 141 | 248 | 170 | 282 | 198 |
| 173 | 238 | 161 | 150 | 256 | 193 | 282 | 198 |
| 154 | 230 | 165 | 158 | -9  | 177 | 265 | 166 |
| 169 | 230 | 165 | 162 | -9  | 193 | 274 | 198 |
| 180 | 210 | 154 | 170 | 247 | 185 | 278 | 193 |
| 184 | 214 | 159 | 170 | 267 | 189 | 278 | 209 |
| 184 | 206 | 155 | 162 | 255 | 185 | 249 | 194 |
| 188 | 214 | 155 | 182 | 255 | 193 | 278 | 202 |
| 169 | 206 | 155 | 158 | 247 | 189 | 270 | 170 |

|     |     |     |     |     |     |     |     |
|-----|-----|-----|-----|-----|-----|-----|-----|
| 184 | 206 | 161 | 182 | 255 | 189 | 278 | 194 |
| 149 | 214 | 153 | 141 | 263 | 193 | 270 | 181 |
| 154 | 234 | 172 | 141 | 263 | 193 | 278 | 198 |
| 149 | 222 | 161 | 150 | 244 | 189 | 265 | 170 |
| 158 | 226 | 165 | 158 | 255 | 193 | 265 | 201 |
| 184 | 210 | 161 | 166 | 247 | 162 | 265 | 194 |
| 184 | 214 | 161 | 178 | 251 | 189 | 278 | 197 |
| 145 | 214 | 161 | 166 | 247 | 170 | 249 | 194 |
| 145 | 218 | 169 | 182 | 251 | 193 | 249 | 198 |
| 184 | 210 | 155 | 162 | 247 | 162 | 278 | 202 |
| 184 | 210 | 159 | 162 | 251 | 193 | 278 | 202 |
| 184 | 206 | 165 | 178 | 251 | 182 | 258 | 194 |
| 184 | 210 | 165 | 178 | 255 | 193 | 258 | 194 |
| 145 | 214 | 165 | 170 | 256 | 186 | 274 | 197 |
| 184 | 218 | 169 | 174 | 256 | 211 | 278 | 201 |
| 154 | 214 | 165 | 170 | 255 | 185 | 270 | 166 |
| 158 | 222 | 165 | 170 | 255 | 197 | 278 | 170 |
| 184 | 206 | 155 | 162 | 247 | 193 | 249 | 194 |
| 188 | 214 | 161 | 170 | 255 | 193 | 278 | 198 |
| 158 | 210 | 155 | 145 | 247 | 178 | 274 | 194 |
| 184 | 226 | 169 | 174 | 247 | 189 | 274 | 194 |
| 145 | 214 | 155 | 166 | 251 | 182 | 265 | 194 |
| 161 | 218 | 161 | 170 | 255 | 189 | 278 | 194 |
| 165 | 206 | 153 | 124 | 256 | 182 | 274 | 194 |
| 169 | 214 | 169 | 137 | 267 | 204 | 278 | 197 |
| 154 | 222 | 161 | 158 | 255 | 189 | 274 | 166 |
| 166 | 230 | 166 | 170 | 255 | 193 | 274 | 170 |
| 181 | 198 | 165 | 137 | 247 | 181 | 270 | 197 |
| 181 | 238 | 169 | 137 | 259 | 181 | 270 | 201 |
| 161 | 202 | 155 | 162 | 247 | 162 | 249 | 186 |
| 184 | 210 | 155 | 178 | 251 | 189 | 282 | 202 |
| 149 | 206 | 153 | 141 | 259 | 185 | 265 | 178 |
| 158 | 230 | 161 | 158 | 267 | 189 | 285 | 181 |



|     |     |     |     |     |     |     |     |
|-----|-----|-----|-----|-----|-----|-----|-----|
| 165 | 226 | 161 | 158 | 248 | 189 | 278 | 190 |
| 203 | 226 | 169 | 166 | 267 | 193 | 281 | 190 |
| 161 | 218 | 165 | 137 | 247 | 193 | 265 | 190 |
| 173 | 234 | 172 | 158 | 259 | 193 | 274 | 193 |
| 184 | 210 | 155 | 137 | 239 | 178 | 278 | 194 |
| 184 | 214 | 161 | 162 | 247 | 189 | 282 | 194 |
| 158 | 214 | 153 | 141 | 247 | 181 | 265 | 197 |
| 165 | 262 | 159 | 158 | 256 | 185 | 285 | 202 |
| 149 | 210 | 155 | 170 | 247 | 189 | 262 | 198 |
| 154 | 222 | 155 | 174 | 255 | 189 | 274 | 202 |
| 165 | 218 | 153 | 145 | 259 | 177 | 274 | 201 |
| 199 | 238 | 153 | 170 | 300 | 186 | 278 | 217 |
| 154 | 210 | 153 | 141 | 255 | 189 | 270 | 198 |
| 158 | 214 | 153 | 162 | 259 | 193 | 278 | 202 |
| 154 | 210 | 153 | 137 | 244 | 177 | 274 | 197 |
| 177 | 266 | 153 | 141 | 255 | 189 | 278 | 197 |
| 161 | 206 | 155 | 170 | 247 | 189 | 249 | 194 |
| 184 | 222 | 157 | 186 | 255 | 193 | 278 | 194 |
| 149 | 202 | 161 | 158 | 260 | 174 | 262 | 189 |
| 173 | 210 | 180 | 158 | 260 | 185 | 265 | 197 |
| 149 | 210 | 155 | 166 | 247 | 189 | 265 | 186 |
| 184 | 214 | 165 | 174 | 247 | 193 | 282 | 194 |
| 184 | 202 | 157 | 162 | 247 | 178 | 278 | 189 |
| 192 | 206 | 169 | 182 | 255 | 193 | 282 | 197 |
| 180 | 214 | 155 | 166 | 247 | 174 | 278 | 194 |
| 184 | 218 | 157 | 170 | 251 | 178 | 289 | 197 |
| 180 | -9  | 155 | 178 | 275 | -9  | -9  | -9  |
| 184 | -9  | 165 | 178 | 275 | -9  | -9  | -9  |
| 184 | 206 | 155 | 178 | 247 | 162 | 253 | 194 |
| 184 | 210 | 165 | 182 | 255 | 178 | 265 | 197 |
| 149 | 231 | 161 | 141 | 255 | 189 | 265 | 194 |
| 169 | 270 | 166 | 158 | 259 | 189 | 278 | 205 |
| 180 | 194 | 161 | 170 | 247 | 162 | 258 | 198 |

|     |     |     |     |     |     |     |     |
|-----|-----|-----|-----|-----|-----|-----|-----|
| 184 | 214 | 173 | 178 | 247 | 189 | 265 | 198 |
| 173 | 234 | 157 | 145 | 256 | 182 | 274 | 170 |
| 184 | 238 | 161 | 170 | 256 | 189 | 282 | 205 |
| 149 | 210 | 157 | 137 | 255 | 193 | 270 | 198 |
| 154 | 214 | 172 | 141 | 263 | 211 | 285 | 198 |
| 161 | 202 | 155 | 174 | 247 | 178 | 278 | 194 |
| 184 | 214 | 161 | 178 | 247 | 189 | 289 | 194 |
| 149 | 226 | 155 | 145 | 247 | 190 | 274 | 194 |
| 154 | 230 | 161 | 162 | 247 | 190 | 274 | 194 |
| 158 | 210 | 165 | 170 | 255 | 185 | 265 | 170 |
| 184 | 214 | 165 | 170 | 260 | 193 | 278 | 197 |
| 158 | 214 | 153 | 137 | 255 | 186 | 265 | 190 |
| 165 | 222 | 169 | 170 | 263 | 189 | 265 | 190 |
| 145 | 202 | 169 | 141 | 259 | 193 | 274 | 197 |
| 149 | 202 | 172 | 158 | 259 | 197 | 274 | 201 |
| 145 | 210 | 153 | 137 | 247 | 182 | 253 | 186 |
| 161 | 234 | 161 | 170 | 251 | 189 | 270 | 190 |
| 161 | 206 | 155 | 162 | 247 | 185 | 249 | 194 |
| 184 | 210 | 161 | 166 | 255 | 189 | 253 | 198 |
| 145 | 214 | 154 | 170 | 256 | 189 | 274 | 197 |
| 184 | 218 | 169 | 174 | 256 | 211 | 278 | 201 |
| 165 | 202 | 161 | 141 | 255 | 193 | 282 | 198 |
| 192 | 246 | 161 | 170 | 263 | 193 | 282 | 202 |
| 184 | 210 | 155 | 137 | 247 | 162 | 258 | 194 |
| 184 | 214 | 165 | 162 | 247 | 181 | 274 | 198 |
| 145 | 206 | 155 | 162 | 247 | 181 | 249 | 181 |
| 149 | 210 | 165 | 182 | 251 | 185 | 282 | 194 |
| 149 | 202 | 169 | 137 | 256 | 174 | 262 | 189 |
| 165 | 206 | 180 | 158 | 256 | 182 | 278 | 197 |
| 149 | 210 | 155 | 162 | 247 | 185 | 265 | 194 |
| 161 | 226 | 165 | 182 | 251 | 189 | 274 | 202 |
| 149 | 206 | 153 | 145 | 247 | 189 | 270 | 189 |
| 184 | 210 | 165 | 162 | 259 | 193 | 274 | 198 |

|     |     |     |     |     |     |     |     |
|-----|-----|-----|-----|-----|-----|-----|-----|
| 161 | 206 | 155 | 162 | 247 | 193 | 278 | 186 |
| 184 | 210 | 155 | 170 | 251 | 197 | 278 | 202 |
| 145 | 206 | 155 | 166 | 247 | 162 | 265 | 194 |
| 184 | 210 | 155 | 174 | 255 | 185 | 278 | 198 |
| 158 | 206 | 153 | 145 | 247 | 177 | 278 | 189 |
| 184 | 214 | 155 | 174 | 247 | 189 | 278 | 189 |
| 161 | 202 | 155 | 162 | 255 | 182 | 253 | 198 |
| 188 | 218 | 157 | 162 | 255 | 189 | 270 | 198 |
| 161 | 202 | 155 | 166 | 247 | 193 | 265 | 194 |
| 184 | 210 | 161 | 174 | 251 | 193 | 265 | 198 |
| 161 | 210 | 161 | 137 | 247 | 185 | 258 | 186 |
| 184 | 214 | 161 | 170 | 247 | 189 | 278 | 194 |
| 145 | 214 | 169 | 170 | 247 | 186 | 274 | 194 |
| 184 | 218 | 176 | 174 | 256 | 189 | 282 | 197 |
| 149 | 210 | 155 | 170 | 239 | 185 | 262 | 181 |
| 154 | 214 | 165 | 186 | 248 | 193 | 282 | 201 |
| 145 | 206 | 155 | 170 | 247 | 162 | 262 | 194 |
| 184 | 214 | 155 | 170 | 255 | 189 | 278 | 202 |
| 173 | 202 | 169 | 137 | -9  | 182 | 262 | 189 |
| 173 | 214 | 180 | 158 | -9  | 185 | 274 | 194 |
| 149 | 206 | 155 | 145 | 247 | 182 | 265 | 189 |
| 161 | 210 | 157 | 158 | 247 | 185 | 282 | 201 |
| 154 | 190 | 155 | 158 | 255 | 189 | 285 | 189 |
| 184 | 218 | 165 | 174 | 263 | 193 | 285 | 198 |
| 184 | 206 | 157 | 170 | 247 | 177 | 270 | 198 |
| 184 | 218 | 169 | 182 | 263 | 185 | 278 | 202 |
| 180 | 210 | 155 | 158 | 239 | 178 | 265 | 194 |
| 184 | 214 | 155 | 162 | 239 | 189 | 282 | 194 |
| 149 | 198 | 157 | 170 | 247 | 182 | 253 | 197 |
| 149 | 210 | 157 | 178 | 255 | 189 | 253 | 197 |
| 169 | 198 | 169 | 137 | 259 | 181 | 270 | 197 |
| 181 | 206 | 169 | 137 | 267 | 204 | 274 | 197 |
| 161 | 210 | 155 | 182 | 251 | 193 | 270 | 194 |

|     |     |     |     |     |     |     |     |
|-----|-----|-----|-----|-----|-----|-----|-----|
| 184 | 222 | 155 | 186 | 255 | 193 | 278 | 198 |
| 154 | 210 | 158 | 158 | 247 | 185 | 274 | 197 |
| 173 | 214 | 169 | 158 | 247 | 189 | 286 | 197 |
| 184 | 202 | 155 | 166 | 247 | 178 | 278 | 194 |
| 184 | 214 | 161 | 174 | 251 | 178 | 278 | 202 |
| 145 | 210 | 155 | 162 | 247 | 185 | 278 | 194 |
| 188 | 214 | 161 | 166 | 255 | 197 | 282 | 198 |
| 149 | 206 | 155 | 145 | 247 | 189 | 265 | 181 |
| 149 | 210 | 165 | 162 | 247 | 193 | 270 | 194 |
| 145 | 202 | 161 | 141 | 255 | 177 | 265 | 198 |
| 188 | 226 | 169 | 182 | 255 | 189 | 265 | 198 |
| 184 | 210 | 155 | 166 | 251 | 178 | 253 | 194 |
| 184 | 218 | 155 | 178 | 255 | 185 | 278 | 194 |
| 145 | 210 | 155 | 170 | 247 | 178 | 278 | 194 |
| 184 | 214 | 161 | 174 | 251 | 193 | 289 | 202 |
| 162 | 222 | 169 | 145 | 248 | 193 | 278 | 189 |
| 173 | 226 | 169 | 162 | 248 | 193 | 281 | 213 |
| 161 | 206 | 155 | 170 | 255 | 162 | 265 | 194 |
| 184 | 214 | 155 | 170 | 255 | 185 | 278 | 198 |
| 162 | 202 | 161 | 162 | 248 | 193 | 270 | 166 |
| 169 | 210 | 161 | 162 | 248 | 197 | 274 | 170 |
| 145 | 210 | 169 | 170 | 251 | 189 | 253 | 193 |
| 184 | 214 | 173 | 170 | 251 | 193 | 282 | 197 |
| 154 | 206 | 172 | 137 | 244 | 189 | 270 | 181 |
| 161 | 226 | 172 | 158 | 267 | 193 | 277 | 209 |
| 184 | 202 | 155 | 166 | 247 | 189 | 265 | 186 |
| 184 | 218 | 161 | 170 | 251 | 193 | 278 | 198 |
| 165 | 222 | 165 | 145 | 243 | 185 | 270 | 197 |
| 173 | 226 | 165 | 166 | 247 | 193 | 274 | 202 |
| 161 | 222 | 153 | 141 | 248 | 185 | 274 | 198 |
| 165 | 254 | 173 | 158 | 255 | 189 | 278 | 201 |
| 184 | 190 | 155 | 170 | 247 | 182 | 253 | 194 |
| 188 | 206 | 155 | 170 | 255 | 185 | 265 | 194 |

|     |     |     |     |     |     |     |     |
|-----|-----|-----|-----|-----|-----|-----|-----|
| 173 | 202 | 155 | 162 | 247 | 193 | 282 | 189 |
| 184 | 226 | 169 | 166 | 260 | 193 | 282 | 194 |
| 184 | 198 | 157 | 170 | 256 | 162 | 285 | 194 |
| 184 | 218 | 157 | 182 | 256 | 189 | 289 | 194 |
| 158 | 202 | 155 | 158 | 255 | 193 | 265 | 170 |
| 184 | 206 | 165 | 182 | 255 | 197 | 289 | 194 |
| 149 | 206 | 161 | 150 | 255 | 193 | 253 | 170 |
| 184 | 226 | 161 | 166 | 255 | 193 | 265 | 194 |
| 154 | 202 | 154 | 158 | 263 | 182 | 270 | 170 |
| 162 | 206 | 165 | 170 | 263 | 186 | 274 | 197 |
| 154 | 218 | 155 | 145 | 256 | 162 | 253 | 194 |
| 158 | 226 | 155 | 166 | 256 | 193 | 274 | 194 |
| 169 | 210 | 161 | 141 | 255 | 177 | 278 | 202 |
| 183 | 214 | 161 | 174 | 271 | 186 | 282 | 202 |
| 184 | 214 | 154 | 145 | 255 | 189 | 270 | 166 |
| 184 | 218 | 165 | 170 | 259 | 193 | 274 | 170 |
| 173 | 230 | 161 | 141 | 252 | 182 | 270 | 170 |
| 184 | 234 | 169 | 150 | 252 | 189 | 274 | 193 |
| 154 | 206 | -9  | 170 | 247 | 193 | 278 | 198 |
| 184 | 218 | -9  | 182 | 256 | 197 | 289 | 206 |
| 145 | 218 | 148 | 162 | 256 | 193 | 277 | 194 |
| 145 | 226 | 153 | 162 | 259 | 200 | 281 | 198 |
| 154 | 230 | 153 | 150 | 259 | 189 | 270 | 170 |
| 154 | 234 | 169 | 150 | 259 | 193 | 281 | 170 |
| 165 | 214 | 155 | 141 | 244 | 185 | 265 | 189 |
| 184 | 218 | 173 | 170 | 247 | 193 | 274 | 193 |
| 169 | 210 | 155 | 145 | 247 | 185 | 265 | 193 |
| 184 | 214 | 155 | 170 | 255 | 193 | 278 | 209 |

| GATA129D11N | GATA8C04 | ATA11D10M | GATA68A03 | GATA24F03 | GATA29F06z | GATA4D07 | GATA63D12P |
|-------------|----------|-----------|-----------|-----------|------------|----------|------------|
| 101         | 195      | 137       | 308       | 174       | 244        | 227      | -9         |
| 113         | 199      | 137       | 308       | 174       | 244        | 231      | -9         |
| 117         | 206      | 126       | 283       | 154       | 240        | 227      | 167        |
| 117         | 214      | 126       | 325       | 174       | 254        | 239      | 179        |
| 113         | 202      | 137       | 325       | 169       | 244        | 243      | 194        |
| 113         | 206      | 137       | 329       | 177       | 244        | 247      | 198        |
| 117         | 202      | 141       | 290       | 154       | 244        | -9       | 161        |
| 117         | 206      | 144       | 360       | 174       | 244        | -9       | 161        |
| 113         | 194      | 131       | 275       | 174       | 244        | 235      | 186        |
| 113         | 214      | 131       | 312       | 182       | 244        | 235      | 204        |
| 117         | 210      | 129       | 321       | 154       | 248        | 235      | 146        |
| 117         | 214      | 135       | 321       | 186       | 248        | 239      | 183        |
| 113         | 202      | 140       | 287       | 178       | 240        | 227      | 186        |
| 113         | 206      | 140       | 311       | 178       | 244        | 235      | 204        |
| 113         | 202      | 143       | 273       | 160       | 243        | 235      | 186        |
| 113         | 210      | 143       | 324       | 174       | 247        | 243      | 186        |
| 113         | 201      | 137       | 312       | 165       | 240        | 227      | 167        |
| 113         | 201      | 141       | 329       | 168       | 244        | 247      | 167        |
| 113         | 201      | 137       | 312       | 173       | 244        | 227      | 171        |
| 113         | 201      | 137       | 321       | 173       | 244        | 239      | 171        |
| 113         | 201      | 131       | 279       | 164       | 244        | 239      | 182        |
| 113         | 210      | 140       | 316       | 164       | 248        | 239      | 194        |
| 117         | 210      | 138       | 266       | 172       | 240        | 239      | 188        |
| 124         | 214      | 144       | 344       | 181       | 244        | 239      | 188        |
| 117         | 206      | 129       | 321       | 179       | 243        | 239      | 175        |
| 117         | 210      | 132       | 329       | 185       | 248        | 243      | 175        |
| 113         | 201      | 131       | 302       | 165       | 244        | 239      | 171        |
| 113         | 201      | 140       | 311       | 173       | 244        | 239      | 171        |
| 120         | 210      | 132       | 275       | 178       | 244        | 227      | 146        |
| 124         | 214      | 132       | 279       | 178       | 246        | 243      | 146        |

|     |     |     |     |     |     |     |     |
|-----|-----|-----|-----|-----|-----|-----|-----|
| 113 | 202 | 137 | 308 | 165 | 244 | 235 | 194 |
| 113 | 206 | 140 | 320 | 165 | 244 | 235 | 194 |
| 117 | 190 | 129 | 291 | 154 | 240 | 243 | 146 |
| 117 | 214 | 132 | 353 | 174 | 244 | 247 | 171 |
| 113 | 206 | 126 | 325 | 154 | 244 | 239 | 179 |
| 117 | 210 | 137 | 325 | 166 | 254 | 239 | 179 |
| 117 | 206 | 141 | 282 | 154 | 285 | 239 | 171 |
| 117 | 210 | 141 | 349 | 174 | 244 | 255 | 179 |
| 113 | 194 | 132 | 320 | 169 | 240 | -9  | 161 |
| 117 | 206 | 140 | 356 | 169 | 244 | -9  | 161 |
| 113 | 207 | 126 | 316 | 178 | 244 | 211 | 179 |
| 117 | 210 | 126 | 325 | 178 | 248 | 211 | 179 |
| 113 | 194 | 126 | 308 | 173 | 240 | 239 | 175 |
| 117 | 206 | 140 | 356 | 177 | 244 | 239 | 175 |
| 120 | 203 | 135 | 282 | 176 | 240 | 227 | 175 |
| 120 | 210 | 147 | 348 | 182 | 240 | 231 | 183 |
| 113 | 201 | 132 | 324 | 154 | 248 | -9  | 161 |
| 117 | 203 | 137 | 341 | 174 | 248 | -9  | 167 |
| 124 | 190 | 141 | 275 | 177 | 244 | 235 | 151 |
| 124 | 199 | 141 | 283 | 177 | 248 | 239 | 171 |
| 124 | 202 | 135 | 279 | 154 | 240 | 227 | 171 |
| 124 | 206 | 141 | 316 | 182 | 240 | 231 | 179 |
| 113 | 187 | 131 | 316 | 156 | 244 | 235 | 183 |
| 113 | 201 | 140 | 328 | 156 | 248 | 239 | 183 |
| 117 | 187 | 132 | 279 | 174 | 244 | 218 | 175 |
| 124 | 210 | 141 | 320 | 174 | 255 | 235 | 179 |
| 120 | 207 | 129 | 275 | 182 | 240 | 239 | 171 |
| 120 | 207 | 129 | 275 | 182 | 248 | 247 | 175 |
| 113 | 206 | 132 | 315 | 156 | 244 | 239 | 188 |
| 117 | 214 | 143 | 324 | 162 | 246 | 251 | 188 |
| 113 | 206 | 137 | 308 | 156 | 244 | 227 | 186 |
| 113 | 210 | 140 | 320 | 178 | 258 | 231 | 194 |
| 113 | 206 | 126 | 271 | 156 | 244 | 239 | 167 |

|     |     |     |     |     |     |     |     |
|-----|-----|-----|-----|-----|-----|-----|-----|
| 120 | 206 | 140 | 320 | 178 | 244 | 243 | 167 |
| 117 | 202 | 141 | 324 | 174 | 244 | -9  | 171 |
| 120 | 206 | 324 | 324 | 174 | 244 | -9  | 171 |
| 120 | 206 | 129 | 341 | 176 | 244 | 239 | 171 |
| 120 | 218 | 132 | 353 | 176 | 244 | 243 | 175 |
| 113 | 194 | 137 | 311 | 174 | 239 | 227 | 190 |
| 113 | 201 | 137 | 319 | 178 | 254 | 239 | 194 |
| 113 | 198 | 137 | 321 | 174 | 244 | 239 | 194 |
| 113 | 210 | 137 | 321 | 174 | 244 | 251 | 201 |
| 113 | 201 | 137 | 291 | 174 | 244 | 227 | 190 |
| 113 | 206 | 140 | 325 | 174 | 258 | 239 | 190 |
| 113 | 198 | 137 | 307 | 173 | 240 | 227 | 186 |
| 113 | 198 | 140 | 320 | 173 | 244 | 239 | 186 |
| 113 | 202 | 140 | 356 | 154 | 240 | -9  | 161 |
| 117 | 206 | 140 | 360 | 170 | 244 | -9  | 161 |
| 117 | 187 | 132 | 266 | 165 | 240 | 227 | 175 |
| 120 | 206 | 141 | 287 | 177 | 240 | 231 | 183 |
| 113 | 198 | 140 | 316 | 174 | 244 | 235 | 182 |
| 113 | 210 | 140 | 320 | 178 | 258 | 243 | 186 |
| 101 | 203 | 129 | 275 | 164 | 244 | 239 | 175 |
| 113 | 207 | 140 | 317 | 174 | 244 | 239 | 186 |
| 113 | 198 | 137 | 320 | 160 | 236 | 231 | 190 |
| 113 | 210 | 137 | 320 | 174 | 244 | 239 | 201 |
| 117 | 199 | 129 | 266 | 154 | 244 | 227 | 171 |
| 117 | 210 | 132 | 287 | 178 | 244 | 247 | 179 |
| 117 | 206 | 129 | 266 | 153 | 244 | 231 | 175 |
| 120 | 206 | 138 | 275 | 153 | 248 | 235 | 183 |
| 117 | 206 | 141 | 265 | 170 | 240 | 243 | 179 |
| 117 | 210 | 141 | 271 | 178 | 244 | 243 | 183 |
| 113 | 206 | 131 | 308 | 177 | 240 | 239 | 194 |
| 113 | 210 | 140 | 316 | 177 | 244 | 243 | 194 |
| 117 | 202 | 138 | 283 | 153 | 244 | 235 | 175 |
| 117 | 206 | 141 | 353 | 153 | 244 | 243 | 183 |



|     |     |     |     |     |     |     |     |
|-----|-----|-----|-----|-----|-----|-----|-----|
| 117 | 206 | 126 | 271 | 181 | 236 | 239 | 183 |
| 117 | 214 | 138 | 344 | 181 | 240 | 239 | 188 |
| 117 | 206 | 132 | 266 | 178 | 240 | 235 | 175 |
| 120 | 206 | 138 | 275 | 178 | 244 | 239 | 179 |
| 101 | 201 | 129 | 282 | 153 | 244 | 227 | 186 |
| 113 | 206 | 137 | 324 | 153 | 244 | 235 | 186 |
| 117 | 206 | 132 | 271 | 170 | 244 | 239 | 175 |
| 124 | 210 | 141 | 283 | 178 | 244 | 243 | 179 |
| 113 | 202 | 137 | 307 | 170 | 244 | 227 | 186 |
| 113 | 206 | 140 | 324 | 178 | 248 | 247 | 186 |
| 117 | 211 | 132 | 290 | 178 | 244 | 239 | 179 |
| 124 | 210 | 144 | 333 | 178 | 252 | 242 | 190 |
| 117 | 210 | 141 | 340 | 154 | 244 | 243 | 171 |
| 117 | 214 | 148 | 348 | 178 | 247 | 247 | 171 |
| 117 | 206 | 126 | 328 | 154 | 244 | 239 | 179 |
| 120 | 210 | 126 | 333 | 182 | 248 | 243 | 188 |
| 113 | 198 | 140 | 311 | 159 | 244 | 235 | 194 |
| 113 | 206 | 140 | 324 | 181 | 258 | 239 | 200 |
| 120 | 202 | 135 | 271 | 173 | 236 | 235 | 171 |
| 124 | 214 | 141 | 346 | 173 | 248 | 235 | 188 |
| 101 | 206 | 137 | 320 | 178 | 244 | 235 | 186 |
| 113 | 206 | 137 | 320 | 178 | 248 | 235 | 190 |
| 113 | 201 | 140 | 287 | 156 | 244 | 231 | 186 |
| 113 | 206 | 143 | 324 | 178 | 248 | 235 | 190 |
| 113 | 201 | 131 | 273 | 174 | 244 | 239 | 171 |
| 113 | 201 | 137 | 290 | 182 | 244 | 239 | 186 |
| 113 | 198 | 137 | 312 | -9  | 248 | 235 | 186 |
| 113 | 210 | 140 | 312 | -9  | 248 | 235 | 186 |
| 113 | 198 | 137 | 311 | 166 | 244 | 239 | 186 |
| 113 | 210 | 140 | 319 | 166 | 248 | 251 | 186 |
| 117 | 206 | 126 | 266 | 154 | 238 | 243 | 167 |
| 120 | 210 | 141 | 312 | 170 | 243 | 247 | 175 |
| 113 | 202 | 137 | 319 | 169 | 244 | 239 | 201 |

|     |     |     |     |     |     |     |     |
|-----|-----|-----|-----|-----|-----|-----|-----|
| 113 | 206 | 143 | 324 | 173 | 247 | 243 | 201 |
| 117 | 203 | 135 | 344 | 161 | 240 | 235 | 175 |
| 117 | 210 | 135 | 353 | 173 | 244 | 247 | 179 |
| 117 | 202 | 141 | 290 | 154 | 244 | -9  | 178 |
| 120 | 206 | 144 | 324 | 174 | 247 | -9  | 178 |
| 113 | 198 | 131 | 311 | 168 | 240 | 227 | 167 |
| 113 | 202 | 140 | 320 | 174 | 244 | 239 | 167 |
| 113 | 206 | 141 | 271 | 164 | 232 | 239 | 175 |
| 117 | 206 | 141 | 316 | 178 | 244 | 239 | 175 |
| 117 | 187 | 135 | 287 | 158 | 232 | 227 | 171 |
| 117 | 206 | 141 | 316 | 178 | 240 | 231 | 183 |
| 117 | 194 | 129 | 271 | 154 | 240 | 239 | 171 |
| 117 | 210 | 140 | 364 | 174 | 247 | 243 | 179 |
| 117 | 198 | 132 | 287 | 154 | 247 | 211 | 171 |
| 120 | 210 | 144 | 287 | 174 | 247 | 247 | 175 |
| 113 | 202 | 131 | 283 | 174 | 244 | 218 | 171 |
| 117 | 214 | 137 | 329 | 178 | 248 | 243 | 171 |
| 113 | 198 | 137 | 319 | 166 | 244 | 235 | 190 |
| 113 | 206 | 140 | 319 | 166 | 258 | 239 | 194 |
| 113 | 202 | 140 | 320 | 154 | 240 | -9  | 161 |
| 113 | 206 | 140 | 356 | 170 | 240 | -9  | 161 |
| 113 | 187 | 140 | 283 | 173 | 244 | 218 | 183 |
| 113 | 206 | 140 | 316 | 177 | 248 | 235 | 183 |
| 113 | 201 | 129 | 312 | 154 | 244 | 227 | 146 |
| 117 | 206 | 140 | 320 | 156 | 244 | 239 | 146 |
| 113 | 206 | 129 | 308 | 182 | 240 | 227 | 146 |
| 124 | 210 | 143 | 320 | 182 | 244 | 239 | 146 |
| 117 | 198 | 129 | 266 | 154 | 236 | 227 | 179 |
| 124 | 202 | 141 | 271 | 174 | 244 | 235 | 188 |
| 113 | 194 | 129 | 279 | 172 | 244 | 239 | 190 |
| 117 | 201 | 143 | 325 | 182 | 244 | 243 | 190 |
| 117 | 201 | 129 | 311 | 154 | 232 | 235 | 147 |
| 117 | 206 | 132 | 320 | 178 | 244 | 243 | 175 |

|     |     |     |     |     |     |     |     |
|-----|-----|-----|-----|-----|-----|-----|-----|
| 113 | 206 | 137 | 323 | 174 | 240 | 227 | 186 |
| 113 | 206 | 143 | 328 | 174 | 258 | 231 | 190 |
| 113 | 201 | 140 | 286 | 173 | 244 | 218 | 190 |
| 113 | 206 | 140 | 320 | 177 | 244 | 231 | 194 |
| 113 | 206 | 141 | 287 | 170 | 244 | 227 | 194 |
| 120 | 206 | 141 | 287 | 173 | 244 | 231 | 194 |
| 113 | 202 | 131 | 321 | 156 | 244 | 231 | -9  |
| 113 | 207 | 137 | 325 | 178 | 252 | 239 | -9  |
| 113 | 198 | 140 | 316 | 174 | 244 | 239 | 182 |
| 113 | 202 | 140 | 325 | 174 | 244 | 243 | 198 |
| 113 | 206 | 126 | 319 | 154 | 240 | 235 | 186 |
| 117 | 210 | 143 | 324 | 174 | 244 | 239 | 200 |
| 113 | 194 | 132 | 356 | 154 | 240 | -9  | 161 |
| 117 | 206 | 140 | 360 | 154 | 244 | -9  | 161 |
| 113 | 203 | 137 | 279 | 160 | 244 | 239 | 195 |
| 113 | 210 | 143 | 287 | 160 | 244 | 243 | 195 |
| 113 | 201 | 140 | 287 | 156 | 244 | 231 | 194 |
| 113 | 210 | 140 | 316 | 165 | 248 | 235 | 194 |
| 120 | 202 | 129 | 287 | 173 | 243 | 227 | 171 |
| 120 | 210 | 135 | 345 | 177 | 248 | 231 | 188 |
| 117 | 206 | 137 | 281 | 156 | 244 | 219 | 175 |
| 120 | 206 | 137 | 323 | 170 | 247 | 243 | 175 |
| 117 | 201 | 132 | 336 | 154 | 247 | -9  | 161 |
| 117 | 206 | 144 | 341 | 173 | 247 | -9  | 161 |
| 113 | 206 | 126 | 312 | 156 | 244 | 231 | 179 |
| 124 | 206 | 140 | 316 | 156 | 248 | 235 | 179 |
| 101 | 206 | 137 | 283 | 153 | 244 | 235 | 186 |
| 113 | 210 | 137 | 325 | 177 | 244 | 251 | 194 |
| 101 | 194 | 131 | 308 | 154 | 244 | 231 | -9  |
| 113 | 202 | 137 | 321 | 174 | 248 | 231 | -9  |
| 117 | 199 | 129 | 265 | 154 | 240 | 243 | 179 |
| 117 | 206 | 141 | 269 | 177 | 244 | 247 | 183 |
| 113 | 198 | 140 | 325 | 160 | 252 | 227 | 175 |

|     |     |     |     |     |     |     |     |
|-----|-----|-----|-----|-----|-----|-----|-----|
| 113 | 202 | 144 | 325 | 160 | 258 | 239 | 175 |
| 117 | 190 | 129 | 290 | 154 | 244 | 243 | 171 |
| 117 | 194 | 129 | 344 | 154 | 256 | 247 | 179 |
| 113 | 202 | 131 | 312 | 168 | 244 | 227 | 167 |
| 113 | 206 | 140 | 329 | 168 | 244 | 247 | 167 |
| 113 | 202 | 131 | 325 | 160 | 240 | 223 | 186 |
| 113 | 206 | 131 | 325 | 160 | 244 | 227 | 190 |
| 117 | 201 | 129 | 287 | 154 | 244 | 239 | 146 |
| 117 | 210 | 143 | 324 | 174 | 244 | 243 | 190 |
| 113 | 201 | 131 | 312 | 178 | 244 | 235 | 186 |
| 113 | 210 | 131 | 316 | 178 | 248 | 235 | 198 |
| 113 | 202 | 137 | 290 | 160 | 244 | 227 | 171 |
| 113 | 202 | 140 | 311 | 174 | 255 | 239 | 186 |
| 113 | 202 | 131 | 312 | 168 | 240 | 227 | 186 |
| 113 | 206 | 137 | 328 | 168 | 244 | 227 | 190 |
| 117 | 199 | 138 | 266 | 172 | 244 | 239 | 183 |
| 124 | 215 | 141 | 271 | 172 | 244 | 247 | 188 |
| 113 | 202 | 137 | 325 | 165 | 244 | 239 | 190 |
| 113 | 206 | 140 | 325 | 169 | 255 | 251 | 190 |
| 120 | 210 | 135 | 333 | 154 | 240 | 227 | 175 |
| 124 | 210 | 141 | 360 | 172 | 244 | 235 | 179 |
| 113 | 201 | 140 | 312 | 160 | 244 | 235 | 186 |
| 113 | 201 | 140 | 321 | 170 | 244 | 243 | 194 |
| 117 | 190 | 132 | 266 | 170 | 244 | 235 | 171 |
| 120 | 210 | 138 | 353 | 178 | 247 | 239 | 171 |
| 113 | 201 | 140 | 321 | 174 | 244 | 227 | 190 |
| 113 | 201 | 140 | 325 | 174 | 244 | 227 | 200 |
| 120 | 203 | 132 | 279 | 169 | 240 | 231 | 146 |
| 124 | 210 | 138 | 283 | 174 | 244 | 247 | 171 |
| 117 | 206 | 132 | 266 | 154 | 244 | 231 | 171 |
| 124 | 214 | 141 | 291 | 178 | 248 | 243 | 183 |
| 113 | 194 | 140 | 316 | 164 | 240 | 243 | 198 |
| 113 | 202 | 140 | 316 | 178 | 244 | 247 | 198 |

|     |     |     |     |     |     |     |     |
|-----|-----|-----|-----|-----|-----|-----|-----|
| 113 | 202 | 138 | 316 | 172 | 240 | 239 | 188 |
| 124 | 210 | 140 | 345 | 172 | 244 | 243 | 188 |
| 113 | 195 | 126 | 324 | 156 | 240 | 227 | -9  |
| 113 | 211 | 126 | 324 | 156 | 244 | 231 | -9  |
| 113 | 210 | 126 | 324 | 176 | 240 | 227 | 175 |
| 120 | 218 | 129 | 341 | 176 | 244 | 239 | 175 |
| 113 | 202 | 126 | 312 | 154 | 244 | 243 | 175 |
| 120 | 207 | 132 | 324 | 176 | 244 | 247 | 175 |
| 124 | 206 | 144 | 287 | 170 | 232 | 239 | 146 |
| 124 | 214 | 147 | 295 | 182 | 244 | 243 | 171 |
| 113 | 202 | 126 | 271 | -9  | 244 | 227 | 175 |
| 113 | 207 | 140 | 325 | -9  | 244 | 227 | 175 |
| 113 | 194 | 129 | 282 | 178 | 244 | 239 | 188 |
| 113 | 206 | 137 | 324 | 182 | 248 | 243 | 188 |
| 124 | 206 | 129 | 278 | 177 | 240 | 227 | 179 |
| 124 | 210 | 132 | 286 | 177 | 244 | 231 | 183 |
| 120 | 207 | 132 | 290 | 177 | 232 | 231 | 175 |
| 120 | 211 | 141 | 360 | 182 | 236 | 251 | 175 |
| 113 | 191 | 131 | 283 | -9  | 235 | 210 | 179 |
| 124 | 201 | 138 | 317 | -9  | 248 | 231 | 179 |
| 113 | 206 | 132 | 291 | 174 | 248 | 211 | 171 |
| 117 | 210 | 140 | 346 | 174 | 248 | 239 | 183 |
| 120 | 202 | 141 | 279 | 182 | 240 | 218 | 171 |
| 124 | 210 | 144 | 312 | 182 | 244 | 231 | 171 |
| 113 | 206 | 126 | 311 | 161 | 240 | 227 | 167 |
| 117 | 214 | 137 | 360 | 177 | 244 | 239 | 167 |
| 113 | 207 | 129 | 312 | 178 | 244 | 235 | 190 |
| 113 | 215 | 137 | 329 | 178 | 244 | 239 | 194 |

---

| <b>GATA88F09</b> | <b>GATA63F09</b> | <b>ATA25F04</b> |
|------------------|------------------|-----------------|
| 286              | -9               | -9              |
| 290              | -9               | -9              |
| 281              | 238              | -9              |
| 298              | 246              | -9              |
| 278              | 246              | -9              |
| 294              | 250              | -9              |
| 274              | 242              | -9              |
| 282              | 246              | -9              |
| 294              | 246              | 249             |
| 299              | 246              | 249             |
| 282              | 250              | -9              |
| 290              | 250              | -9              |
| 286              | 250              | 243             |
| 290              | 250              | 243             |
| 286              | 242              | -9              |
| 294              | 246              | -9              |
| 282              | 246              | -9              |
| 286              | 246              | -9              |
| 286              | 242              | -9              |
| 299              | 250              | -9              |
| 270              | 242              | -9              |
| 294              | 246              | -9              |
| 290              | 245              | -9              |
| 298              | 245              | -9              |
| 285              | 250              | -9              |
| 299              | 250              | -9              |
| 286              | 246              | -9              |
| 290              | 250              | -9              |
| 270              | 246              | 249             |
| 274              | 250              | 249             |

|     |     |     |
|-----|-----|-----|
| 290 | 242 | -9  |
| 294 | 246 | -9  |
| 290 | 226 | -9  |
| 306 | 254 | -9  |
| 290 | 246 | -9  |
| 298 | 246 | -9  |
| 282 | 222 | 249 |
| 298 | 250 | 249 |
| 281 | 245 | -9  |
| 298 | 249 | -9  |
| 274 | 242 | -9  |
| 298 | 250 | -9  |
| 253 | 246 | 243 |
| 290 | 246 | 243 |
| 270 | 246 | -9  |
| 278 | 246 | -9  |
| 274 | 246 | -9  |
| 286 | 250 | -9  |
| 278 | 242 | -9  |
| 290 | 242 | -9  |
| 266 | 234 | -9  |
| 270 | 246 | -9  |
| 286 | 242 | -9  |
| 290 | 246 | -9  |
| 286 | 242 | -9  |
| 290 | 250 | -9  |
| 274 | 250 | -9  |
| 309 | 250 | -9  |
| 290 | 246 | 237 |
| 294 | 246 | 237 |
| 290 | 246 | -9  |
| 294 | 246 | -9  |
| 290 | 238 | 228 |

|     |     |     |
|-----|-----|-----|
| 302 | 246 | 228 |
| 266 | 246 | -9  |
| 270 | 250 | -9  |
| 290 | 246 | -9  |
| 306 | 246 | -9  |
| 282 | 246 | 246 |
| 290 | 246 | 246 |
| 286 | 238 | -9  |
| 294 | 250 | -9  |
| 282 | 246 | -9  |
| 290 | 250 | -9  |
| 286 | 246 | -9  |
| 294 | 246 | -9  |
| 274 | 246 | -9  |
| 299 | 246 | -9  |
| 266 | 250 | 249 |
| 313 | 250 | 249 |
| 282 | 246 | -9  |
| 290 | 250 | -9  |
| 278 | 246 | -9  |
| 278 | 246 | -9  |
| 278 | 246 | -9  |
| 286 | 246 | -9  |
| 281 | 242 | -9  |
| 300 | 242 | -9  |
| 313 | 250 | -9  |
| 313 | 250 | -9  |
| 290 | 246 | 258 |
| 302 | 246 | 258 |
| 290 | 242 | 249 |
| 294 | 246 | 249 |
| 266 | 238 | -9  |
| 285 | 250 | -9  |



|     |     |     |
|-----|-----|-----|
| 290 | 238 | -9  |
| 290 | 245 | -9  |
| 290 | 238 | -9  |
| 294 | 250 | -9  |
| 286 | 246 | -9  |
| 290 | 262 | -9  |
| 286 | 238 | -9  |
| 300 | 246 | -9  |
| 290 | 246 | -9  |
| 294 | 246 | -9  |
| 266 | 242 | 258 |
| 298 | 242 | 258 |
| 294 | 246 | -9  |
| 298 | 262 | -9  |
| 290 | 250 | -9  |
| 302 | 250 | -9  |
| 290 | 242 | 249 |
| 294 | 246 | 249 |
| 270 | 242 | 258 |
| 282 | 242 | 258 |
| 286 | 242 | -9  |
| 290 | 246 | -9  |
| 286 | 250 | -9  |
| 290 | 250 | -9  |
| 282 | 242 | 249 |
| 282 | 246 | 249 |
| -9  | 242 | -9  |
| -9  | 250 | -9  |
| 282 | 242 | 243 |
| 286 | 250 | 243 |
| 294 | 238 | 228 |
| 302 | 238 | 228 |
| 285 | 246 | -9  |

|     |     |     |
|-----|-----|-----|
| 294 | 250 | -9  |
| 270 | 250 | -9  |
| 270 | 250 | -9  |
| 270 | 246 | -9  |
| 298 | 258 | -9  |
| 282 | 246 | 249 |
| 286 | 250 | 249 |
| 274 | 246 | -9  |
| 278 | 246 | -9  |
| 286 | 250 | 249 |
| 313 | 250 | 249 |
| 274 | 246 | -9  |
| 298 | 246 | -9  |
| 282 | 246 | 249 |
| 286 | 246 | 249 |
| 262 | 250 | -9  |
| 294 | 250 | -9  |
| 282 | 242 | 243 |
| 286 | 246 | 243 |
| 281 | 246 | -9  |
| 298 | 250 | -9  |
| 270 | 250 | -9  |
| 282 | 250 | -9  |
| 290 | 254 | 261 |
| 302 | 262 | 261 |
| 286 | 250 | -9  |
| 290 | 250 | -9  |
| 270 | 242 | 258 |
| 281 | 242 | 258 |
| 291 | 246 | -9  |
| 294 | 262 | -9  |
| 266 | 246 | 261 |
| 302 | 262 | 261 |

|     |     |     |
|-----|-----|-----|
| 290 | 250 | -9  |
| 294 | 254 | -9  |
| 290 | 246 | -9  |
| 294 | 246 | -9  |
| 286 | 250 | -9  |
| 294 | 250 | -9  |
| 290 | 246 | -9  |
| 290 | 250 | -9  |
| 282 | 242 | 243 |
| 290 | 246 | 243 |
| 286 | 246 | 237 |
| 290 | 250 | 237 |
| 274 | 246 | -9  |
| 281 | 250 | -9  |
| 286 | 246 | -9  |
| 290 | 246 | -9  |
| 270 | 242 | -9  |
| 286 | 246 | -9  |
| 270 | -9  | 258 |
| 302 | -9  | 258 |
| 278 | 242 | 252 |
| 294 | 242 | 252 |
| 274 | 250 | -9  |
| 298 | 258 | -9  |
| 290 | 242 | -9  |
| 294 | 254 | -9  |
| 290 | 242 | 249 |
| 290 | 246 | 249 |
| 286 | -9  | -9  |
| 286 | -9  | -9  |
| 294 | 242 | 258 |
| 302 | 242 | 258 |
| 278 | 242 | 249 |

|     |     |     |
|-----|-----|-----|
| 290 | 246 | 249 |
| 294 | 226 | -9  |
| 306 | 250 | -9  |
| 286 | 246 | -9  |
| 286 | 246 | -9  |
| 286 | 238 | -9  |
| 290 | 246 | -9  |
| 266 | 246 | 261 |
| 290 | 246 | 261 |
| 290 | 242 | 252 |
| 294 | 242 | 252 |
| 282 | 246 | 249 |
| 290 | 246 | 249 |
| 282 | 250 | -9  |
| 294 | 254 | -9  |
| 286 | 238 | -9  |
| 290 | 245 | -9  |
| 290 | 242 | -9  |
| 294 | 246 | -9  |
| 270 | 250 | -9  |
| 278 | 250 | -9  |
| 290 | 246 | 243 |
| 294 | 246 | 243 |
| 274 | 260 | -9  |
| 300 | 260 | -9  |
| 294 | 242 | -9  |
| 294 | 246 | -9  |
| 309 | 250 | 249 |
| 313 | 250 | 249 |
| 266 | 250 | -9  |
| 282 | 250 | -9  |
| 290 | 246 | 249 |
| 290 | 250 | 249 |

|     |     |     |
|-----|-----|-----|
| 282 | 242 | 243 |
| 290 | 245 | 243 |
| 274 | -9  | -9  |
| 286 | -9  | -9  |
| 290 | 246 | 243 |
| 299 | 250 | 243 |
| 290 | -9  | 243 |
| 299 | -9  | 243 |
| 274 | 254 | -9  |
| 298 | 254 | -9  |
| 278 | -9  | 243 |
| 299 | -9  | 243 |
| 281 | 246 | 228 |
| 285 | 246 | 228 |
| 274 | 246 | 240 |
| 274 | 250 | 240 |
| 286 | 250 | 249 |
| 313 | 254 | 249 |
| 274 | -9  | -9  |
| 298 | -9  | -9  |
| 274 | 238 | 249 |
| 278 | 242 | 249 |
| 266 | 246 | 249 |
| 278 | 246 | 249 |
| 274 | 238 | -9  |
| 281 | 242 | -9  |
| 281 | 242 | 237 |
| 294 | 242 | 237 |
